# Supplementary material for: Cetaceans of north-western continental Africa (Morocco to Liberia): diversity and distribution
Source: Frontiers journal article supplement (doi:10.3389/fmars.2024.1427334), 2024-07-19
Supplement: Data_Sheet_1.pdf [file Data_Sheet_1.pdf]

# Appendix A

## Literature Review

Appendix B

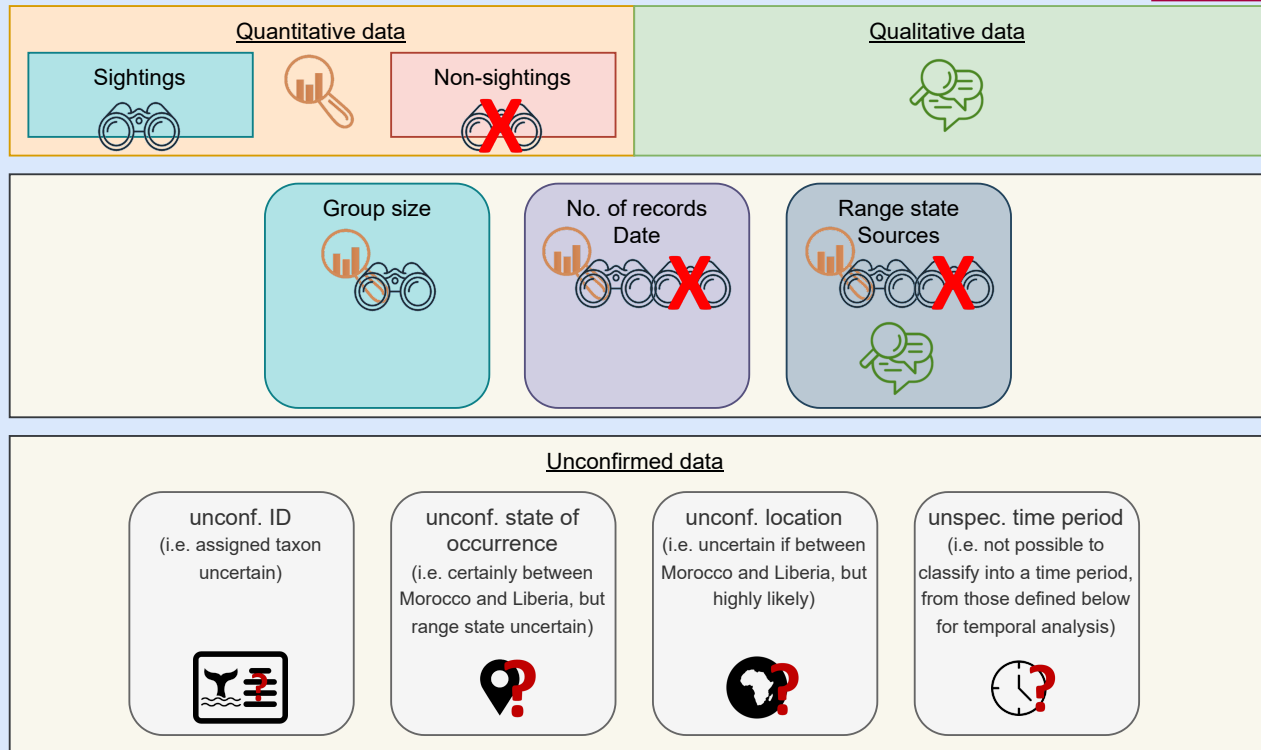

## Literature Analysis

### Descriptive Analysis

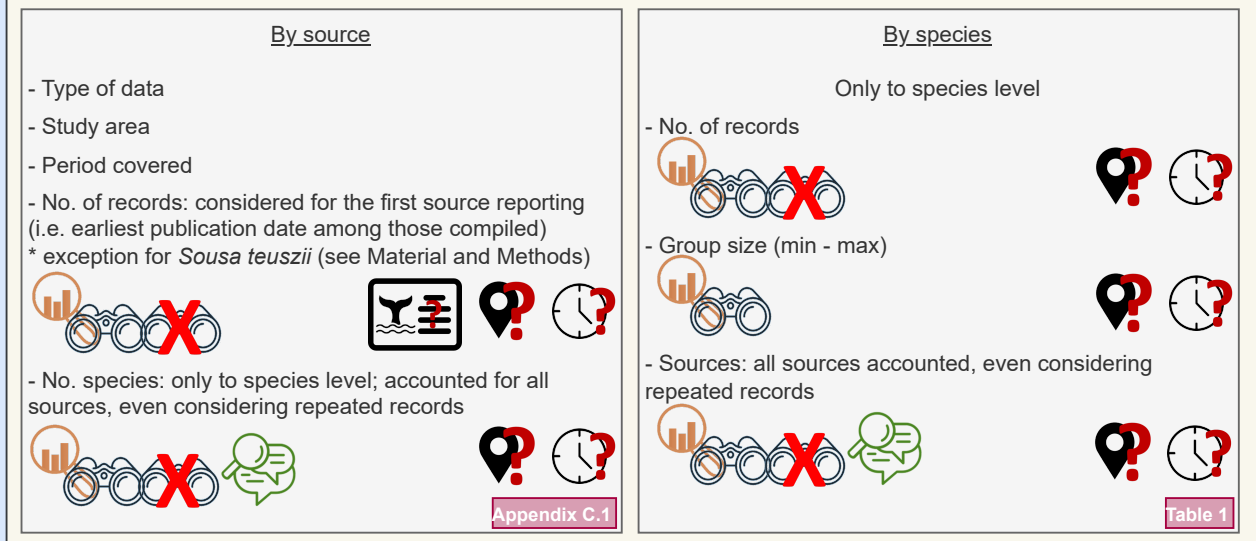

### Temporal Analysis - time-periods considered: <2000; 2000-2010; 2011-2020

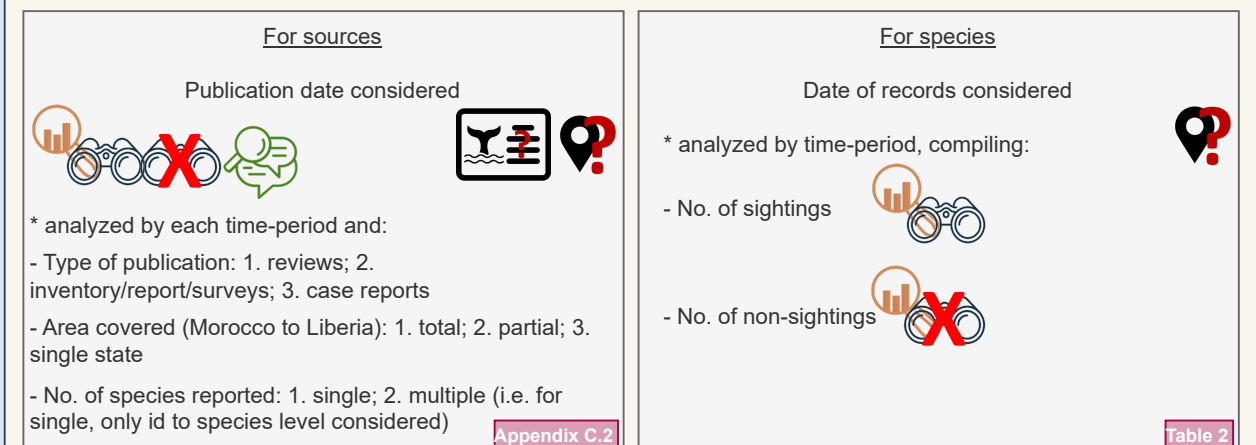

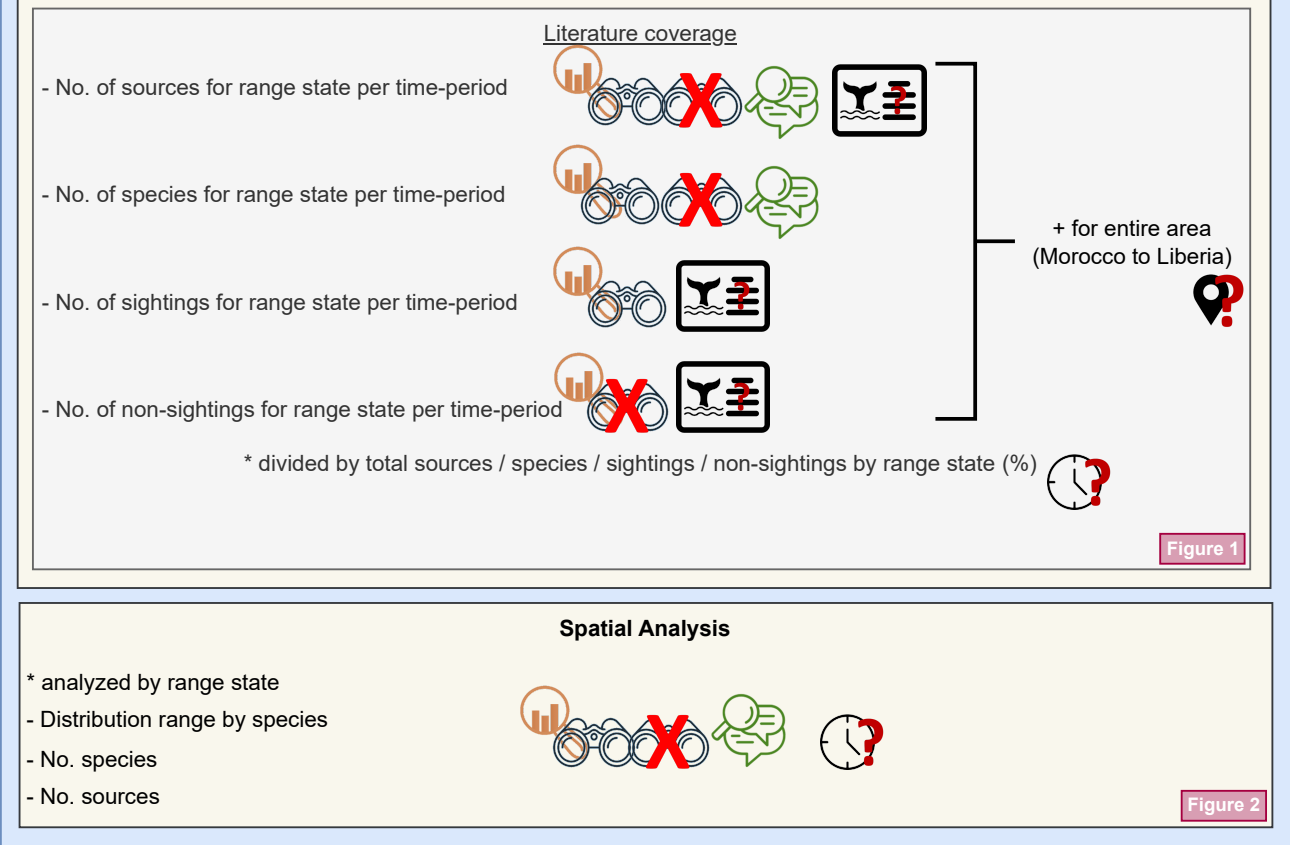

**Appendix A.** Schematic summary of the process for literature review and analysis. The type of data used in each analysis is represented by the respective icons. Whenever unconfirmed data of any kind was used, the respective icons are also indicated. The appendix / table / figure where the results are provided is indicated under pink boxes. No - number; unconf - unconfirmed.
