# Supplementary material for: Cetaceans of north-western continental Africa (Morocco to Liberia): diversity and distribution
Source: Frontiers journal article supplement (doi:10.3389/fmars.2024.1427334), 2024-07-19
Supplement: Data_Sheet_2.pdf [file Data_Sheet_2.pdf]

**Appendix C** Tables summarizing sources for cetacean records within north-western Africa.

**C.1.**

| Sources                       | Type of data                                                                                     | Study area                                                                     | Period covered                                                       | No of species | No of records          |
|-------------------------------|--------------------------------------------------------------------------------------------------|--------------------------------------------------------------------------------|----------------------------------------------------------------------|---------------|------------------------|
| Báez <i>et al.</i> 2020       | OPOs<br>(commercial fishing vessels)<br>( <i>Physeter macrocephalus</i> )                        | Mauritania to Congo <sup>1</sup>                                               | Jan 2003 to Dec 2016                                                 | 1 (1)         | 47s                    |
| Baines & Reichelt 2014        | OPOs<br>(seismic surveys)                                                                        | Mauritania                                                                     | Nov 2012 to Jan 2013                                                 | 15 (15)       | 236s + 2ns             |
| Bamy <i>et al.</i> 2010       | Inventory<br>(cetacean species)                                                                  | Guinea                                                                         | 1953-2008                                                            | 9 (9)         | 4s + 10ns              |
| Benchoucha <i>et al.</i> 2018 | Stranding<br>( <i>Kogia sima</i> )                                                               | Morocco                                                                        | Apr 2015                                                             | 1 (1)         | 1ns                    |
| Boisseau <i>et al.</i> 2007   | Dedicated surveys (vessel) + Acoustic<br>( <i>Phocoena phocoena</i> )                            | Morocco to Mauritania                                                          | Apr to May 2005                                                      | 1 (1)         | 7s + 50ns              |
| Boisseau <i>et al.</i> 2010   | Dedicated surveys<br>(vessel)                                                                    | Morocco to South Adriatic <sup>2</sup>                                         | Morocco block: Apr 2005                                              | 6 (6)         | 16s                    |
| Bowman Bishaw Goham 2003      | Report<br>(EIA)                                                                                  | Mauritania                                                                     | Mar 2003                                                             | 8 (8)         | 19s                    |
| Camphuysen 2000               | Report<br>(cruise)                                                                               | Morocco to Senegal                                                             | Jan 2000                                                             | 11 (11)       | 71s                    |
| Camphuysen <i>et al.</i> 2012 | Report<br>(cruise)                                                                               | Mauritania                                                                     | Nov to Dec 2012                                                      | 10 (10)       | 63s                    |
| Correia <i>et al.</i> 2019a   | OPOs<br>(commercial routes)                                                                      | Morocco to Senegal                                                             | Surveys: May to Oct 2015<br>Feb + Aug to Dec 2016<br>Jun to Sep 2017 | 20 (20)       | 456s <sup>a</sup>      |
| Djiba <i>et al.</i> 2015      | OPOs<br>(fishing research vessel)                                                                | Morocco to Guinea                                                              | Surveys: Oct to Dec 2011<br>May to Jul 2012<br>May 2013              | 18 (18)       | 281s + 19ns            |
| Expósito & Qnimba 2010        | Ship trip                                                                                        | Morocco to Canaries <sup>2</sup>                                               | Sep 2010                                                             | 4 (3)         | 5s                     |
| Gray & Van Waerebeek 2011     | Dolphin response to 3D seismic<br>explorations                                                   | Liberia                                                                        | 18 <sup>th</sup> March 2009                                          | 2 (2)         | 14s                    |
| Hammond & Lockyer 1988        | Review<br>( <i>Orcinus orca</i> )                                                                | Equator to British Isles (+<br>Mediterranean and Baltic seas) <sup>3</sup>     | 1950-1988                                                            | 1 (1)         | 38s <sup>b</sup> + 8ns |
| Jefferson <i>et al.</i> 1997  | Review<br>(cetacean species)                                                                     | Strait Gibraltar to Congo (+<br>Madeira, Canaries and Cape Verde) <sup>3</sup> | Non-specified                                                        | 18 (5)        | 10s <sup>c</sup> + 9ns |
| Jung <i>et al.</i> 2016       | Stranding<br>( <i>Balaenoptera omurai</i> )                                                      | Mauritania                                                                     | Nov 2013                                                             | 1 (1)         | 1ns                    |
| Leeney <i>et al.</i> 2016     | Dedicated surveys (vessel)<br>+ review<br>( <i>Tursiops truncatus</i> and <i>Sousa teuszii</i> ) | Guinea-Bissau                                                                  | Survey: Feb to Apr 2008<br>Review: 1761 to 2009                      | 10 (10)       | 149s + 1ns             |
| Lydersen <i>et al.</i> 2020   | Tagging<br>( <i>Balaenoptera physalus</i> )                                                      | Norway to Morocco <sup>2</sup>                                                 | Nov to Dec 2019                                                      | 1 (1)         | 1ns                    |
| Masski & de Stéphanis 2015    | Strandings database                                                                              | Morocco and Canaries <sup>2</sup>                                              | 1980 to 2009                                                         | 27 (3)        | 9ns                    |
| Moore <i>et al.</i> 2010      | Interview survey<br>(fishing effort and by-catch)                                                | Africa, Asia, Caribbean <sup>4</sup>                                           | 2007 to 2008                                                         | 4 (0)         | QO                     |
| Mullié <i>et al.</i> 2013     | Strandings                                                                                       | Mauritania                                                                     | Nov 2012<br>Jan to Feb 2013<br>Apr to May 2013                       | 5 (5)         | 28ns                   |

|                                           |                                                                                                     |                                                         |                                                          |                     |                          |
|-------------------------------------------|-----------------------------------------------------------------------------------------------------|---------------------------------------------------------|----------------------------------------------------------|---------------------|--------------------------|
| Notarbartolo di Sciara <i>et al.</i> 1997 | Report on birth at sea<br>( <i>Pseudorca crassidens</i> )                                           | Morocco                                                 | 1995                                                     | 1 (1)               | 2s                       |
| Pinela <i>et al.</i> 2010                 | Samples collected opportunistically<br>(stable isotope analyses)                                    | Mauritania                                              | 1990 to 2008                                             | 12 (12)             | 231ns                    |
| Perrin & Van Waerebeek 2012               | Review<br>(small cetaceans)                                                                         | Morocco to South Africa (+<br>Macaronesia) <sup>3</sup> | Non-specified                                            | 24 (0)              | QO                       |
| Robards and Reeves 2011                   | Review<br>(marine mammal consumption)                                                               | Worldwide <sup>5</sup>                                  | 1970 to 2009                                             | 12 (0)              | QO                       |
| Robineau & Vely 1998                      | Beach monitoring (census)<br>+ review (cetacean species)                                            | Mauritania                                              | Monitoring: Nov 1994<br>Jan to Feb, Jun and Nov,<br>1995 | 29 (21)             | 90s + 282ns <sup>d</sup> |
| Rojo-Nieto <i>et al.</i> 2011             | Strandings                                                                                          | Alboran sea and Strait Gibraltar <sup>2</sup>           | 1991 to 2008 (plus other<br>isolated years)              | 10 (10)             | 422ns                    |
| Russel <i>et al.</i> 2018                 | OPOs<br>(geophysical survey)                                                                        | Mauritania                                              | Sep to Dec 2012                                          | 15 (15)             | 228s                     |
| Tsai & Mead 2018                          | Stranding<br>( <i>Caperea marginata</i> )                                                           | The Gambia                                              | Jan 1995                                                 | 1 (1)               | 1ns                      |
| Tudela <i>et al.</i> 2005                 | Fishing monitoring<br>(by-catches)                                                                  | Morocco                                                 | Dec 2002 to Sep 2003                                     | 2 (2)               | 237ns                    |
| Tulp & Leopold 2004                       | Report<br>(census)                                                                                  | Mauritania                                              | Apr 2004                                                 | 6 (6)               | 13s                      |
| Van Waerebeek <i>et al.</i> 1999          | Review: strandings + captures + by-<br>catches + sightings<br>( <i>Balaenoptera acutorostrata</i> ) | Galicia to Gabon (+ Macaronesia) <sup>3</sup>           | 1905 to 1998                                             | 1 (1)               | 4s <sup>e</sup> + 6ns    |
| Van Waerebeek <i>et al.</i> 2000          | Report<br>(UNEP-CMS)                                                                                | Senegal to Guinea-Bissau                                | Up to 1998                                               | 23 (23)             | 97s + 550ns              |
| Van Waerebeek <i>et al.</i> 2013          | OPOs<br>(fishing and oceanographic research)<br>( <i>Megaptera novaeangliae</i> )                   | Morocco to Guinea                                       | Oct to Dec 2011                                          | 1 (1)               | 21s                      |
| Van Waerebeek <i>et al.</i> 2017          | Dedicated and opportunistic beach and<br>at-sea surveys<br>( <i>Sousa teuszii</i> )                 | Guinea, Nigeria, Togo and<br>Cameroon <sup>6</sup>      | Guinea: 2012                                             | 2 (2 <sup>f</sup> ) | 2s + 6ns                 |
| Weir & Collins 2015                       | Review<br>( <i>Sousa teuszii</i> )                                                                  | Strait Gibraltar to Angola <sup>3</sup>                 | <1970-2015                                               | 1 (1)               | 321s + 41ns              |
| Weir & Pierce 2013                        | Review<br>(human activities impacting cetaceans)                                                    | Mauritania to Angola <sup>1</sup>                       | 1942 to 2005                                             | 17 (17)             | 263ns                    |
| Weir <i>et al.</i> 2014                   | Review<br>( <i>Stenella clymene</i> )                                                               | Mauritania to Angola <sup>1</sup>                       | 1846 to 1995                                             | 1 (1)               | 17s                      |
| Weir 2016                                 | Dedicated surveys<br>( <i>Sousa teuszii</i> )                                                       | Senegal                                                 | Oct to Nov 2015                                          | 1 (1)               | 30s <sup>g</sup>         |
| This review                               | Review<br>(cetacean species)                                                                        | Morocco to Liberia                                      | Non-specified                                            | 36 (34)             | 2241s + 2178ns           |

No – number; s – sightings records; ns – non-sightings records; OPOs – Observation Platforms of Opportunity; EIA – Environmental Impact Assessment; QO – Qualitative-only. The table is organized by alphabetical order of the citations, and by year within the citations with the same author. The information presented corresponds to records reported within the geographical range of the study area (Morocco to Liberia – records with unconfirmed location not included). Number of species included only confirmed identifications to the species level, with number of species reported with quantitative data within brackets. Numbers of records are sightings + non-sightings of both confirmed and unconfirmed identifications. Whenever studies were dedicated to one single species, this is identified within brackets in the “Type of data” column.<sup>1</sup> Compiled records only from Mauritania to Liberia; <sup>2</sup> Compiled records only from Morocco; <sup>3</sup> Compiled records only from Morocco to Liberia; <sup>4</sup> Compiled records only from Sierra Leone; <sup>5</sup> Compiled records only from Mauritania to Sierra Leone; <sup>6</sup> Compiled records only from Guinea. <sup>a</sup> Single-taxon sightings (sightings with two taxa are accounted twice – one for each taxa); <sup>b</sup> Three sighting records correspond to groups that were sighted several times in the area; <sup>c</sup> One sighting record corresponds to one individual, the “Senegal dolphin”, sighted several times in the area; <sup>d</sup> There were three more non-sightings reports: 15 captures + strandings; 17 specimens; 19 captures + strandings. Captures from this source are mostly/all cited in Weir & Pierce 2013 and the 17 specimens are under the IFAN collection (presented by Van Waerebeek *et al.* 2000). There is no confirmation on the exact number of strandings, hence, these three reports were not considered here; <sup>e</sup> One sighting record corresponds to one individual sighted several times in the area. <sup>f</sup> Although Van Waerebeek *et al.* (2017) focus only on *Sousa teuszii*, they also mention (secondary source) a stranding of *Tursiops truncatus*, here included. <sup>g</sup> There are three re-sightings included.

## C.2.

| Number of publications reporting on single or multiple species, sightings or non-sightings by type, time-period and area covered. |           |              |                |                  |       |
|-----------------------------------------------------------------------------------------------------------------------------------|-----------|--------------|----------------|------------------|-------|
| Type                                                                                                                              | Period    | Area         | Single species | Multiple species | TOTAL |
| Reviews                                                                                                                           | <2000     | Total area   | 2              | 1                | 3     |
|                                                                                                                                   |           | Partial area |                |                  |       |
|                                                                                                                                   |           | Single state |                | 1                | 1     |
|                                                                                                                                   | 2000-2010 | Total area   |                |                  |       |
|                                                                                                                                   |           | Partial area |                |                  |       |
|                                                                                                                                   |           | Single state |                |                  |       |
|                                                                                                                                   | 2011-2020 | Total area   | 1              | 1                | 2     |
|                                                                                                                                   |           | Partial area | 1              | 2                | 3     |
|                                                                                                                                   |           | Single state |                | 1                | 1     |
|                                                                                                                                   | TOTAL     |              | 4              | 6                | 10    |
| Inventories/reports/surveys                                                                                                       | <2000     | Total area   |                |                  |       |
|                                                                                                                                   |           | Partial area |                |                  |       |
|                                                                                                                                   |           | Single state |                |                  |       |
|                                                                                                                                   | 2000-2010 | Total area   |                |                  |       |
|                                                                                                                                   |           | Partial area | 1              | 2                | 3     |
|                                                                                                                                   |           | Single state |                | 8                | 8     |
|                                                                                                                                   | 2011-2020 | Total area   |                |                  |       |
|                                                                                                                                   |           | Partial area | 2              | 2                | 4     |
|                                                                                                                                   |           | Single state | 2              | 7                | 9     |
|                                                                                                                                   | TOTAL     |              | 5              | 19               | 24    |
| Case reports                                                                                                                      | <2000     | Total area   |                |                  |       |
|                                                                                                                                   |           | Partial area |                |                  |       |
|                                                                                                                                   |           | Single state | 1              |                  | 1     |
|                                                                                                                                   | 2000-2010 | Total area   |                |                  |       |
|                                                                                                                                   |           | Partial area |                |                  |       |
|                                                                                                                                   |           | Single state |                |                  |       |
|                                                                                                                                   | 2011-2020 | Total area   |                |                  |       |
|                                                                                                                                   |           | Partial area |                |                  |       |
|                                                                                                                                   |           | Single state | 4              |                  | 4     |
|                                                                                                                                   | TOTAL     |              | 5              |                  | 5     |

Not including the present review. The information presented corresponds to records reported within the range of the study area (Morocco to Liberia – records with unconfirmed location not included). For single species, only identification to species level was considered.
