# Supplementary material for: Cetaceans of north-western continental Africa (Morocco to Liberia): diversity and distribution
Source: Frontiers journal article supplement (doi:10.3389/fmars.2024.1427334), 2024-07-19
Supplement: Table_1.XLS [file Table_1.XLS]

## Sheet: Records - quantitative
Appendix B Records from literature review. Records compiled as with "unconf. location" are those probably within the study range (Morocco to Liberia) but without sufficient data for a positive confirmation.
Records compiled as "unconf. state of occurrence" are those definitely within the study area but with no confirmation on the state of occurrence. Records marked as with "unconf. ID" are those for which the registered taxon is not verified.
Records of Cetaceans in literature for the northwestern Africa (Morocco - Liberia) - Quantitative data
Species	Sightings records	Group size	Non-sightings records	Country	Region	Date	Source	If secondary, original source	Comments
Balaenoptera acutorostrata	-	-	1	Guinea	Bay of Tabounsou	March 1986	Bamy et al. 2010; Weir & Pierce 2013	Bamy et al. 2006	-
Balaenoptera acutorostrata	1	1	-	Morocco	34°15.017'N ; 8°08.661'W	10 September 2010	Expósito & Qninba 2010	-	-
Balaenoptera acutorostrata	-	-	1	Mauritania	-	1992 to 1995	Robineau & Vely 1998; Van Waerebeek et al. 1999	-	-
Balaenoptera acutorostrata	1*	1	-	Western Sahara	Garnet´s Bay	12 November 1994	Van Waerebeek et al. 1999	Martín 1997	*same animal sighted several times
Balaenoptera acutorostrata	2	1,1	-	Western Sahara	Rio de Oro	March 1997	Van Waerebeek et al. 1999	-	-
Balaenoptera acutorostrata	-	-	1	Senegal	Barbarie	13 March 1979	Van Waerebeek et al. 1999	Dupuy & Maigret 1980	-
Balaenoptera acutorostrata	-	-	1	Senegal	Dakar	1982	Van Waerebeek et al. 1999	-	-
Balaenoptera acutorostrata	1	2	-	The Gambia	Gambia estuary	January 1998	Van Waerebeek et al. 1999	-	-
Balaenoptera acutorostrata	-	-	1	Senegal	M'Bao	15 July 1986	Van Waerebeek et al. 1999; Van Waerebeek et al. 2000	-	-
Balaenoptera acutorostrata	-	-	1	Senegal	Djifer	23 November 1996	Van Waerebeek et al. 1999; Van Waerebeek et al. 2000	-	-
Balaenoptera acutorostrata	-	-	1	Senegal	Barbarie	21 October 1977	Van Waerebeek et al. 1999; Van Waerebeek et al. 2000	Dupuy & Maigret 1978	-
Balaenoptera acutorostrata	-	-	1	Senegal	Hann	14 May 1993	Van Waerebeek et al. 1999; Weir & Pierce 2013; Bamy et al. 2010; Van Waerebeek et al. 2000	Van Waerebeek et al. 1999	-
Balaenoptera acutorostrata	-	-	1	Morocco	Mediterranean Moroccan coast	1986	Rojo-Nieto et al. 2011	-	-
Balaenoptera acutorostrata	-	-	4	Morocco	Mediterranean Moroccan coast	1991-1999	Rojo-Nieto et al. 2011	-	-
Balaenoptera acutorostrata	-	-	3	Morocco	Mediterranean Moroccan coast	2000-2008	Rojo-Nieto et al. 2011	-	-
Balaenoptera acutorostrata	3	1-3	-	Western Sahara	Offshore	Surveys: May to Oct 2015, Feb + Aug-Dec 2016, Jun-Sep 2017	Correia et al. 2019	-	see sheet "CETUS Data - details"
Balaenoptera acutorostrata	1	1	-	Mauritania	Offshore	Surveys: May to Oct 2015, Feb + Aug-Dec 2016, Jun-Sep 2017	Correia et al. 2019	-	see sheet "CETUS Data - details"
Balaenoptera acutorostrata	-	-	1	Morocco	Rabat	1980 to 2009 (unspec. time period)	Masski & De Stéphanis 2015	-	-
Balaenoptera acutorostrata	-	-	1	Mauritania	-	1990 to 2008 (unspec. time period)	Pinela et al. 2010	-	-
Balaenoptera acutorostrata (unconf. location)	-	-	2	-	-	(unspec. time period)	Van Waerebeek et al. 2000	-	-
Balaenoptera borealis	7	1-18	-	Mauritania	-	15 November 2012 to 14 January 2013	Baines & Reichelt 2014	-	-
Balaenoptera borealis	1	1	-	Morocco	-	April 2005	Boisseau et al. 2010	-	-
Balaenoptera borealis	1	1	-	Mauritania	-	11-22 March 2003	Bowman Bishaw Goham 2003	-	-
Balaenoptera borealis	-	-	1	Mauritania	17°40.2'N ; 16°37.8'W	1 June 2012	Djiba et al. 2015	-	-
Balaenoptera borealis	-	-	1	Mauritania	Baie du Lévrier	16 February 1981	Robineau & Vely 1998; Van Waerebeek et al. 2000	Maigret 1981b	-
Balaenoptera borealis	9	-	-	Mauritania	off Nouakchott	2 September to 1 December 2012	Russel et al. 2018	-	-
Balaenoptera borealis (unconf location)	-	-	1	-	-	19 March 1998	Van Waerebeek et al. 2000	-	-
Balaenoptera borealis (unconf. ID and state of occurrence)	1	2	-	between Morocco and Guinea	-	21 October 2011 to 22 May 2013	Djiba et al. 2015	-	-
Balaenoptera borealis (unconf. ID)	-	-	1	Mauritania	-	November 2012 to May 2013	Mullié et al. 2013	-	-
Balaenoptera borealis or edeni (unconf. ID and state of occurrence)	6	1	-	between Morocco and Guinea	-	21 October 2011 to 22 May 2013	Djiba et al. 2015	-	-
Balaenoptera borealis or edeni (unconf. ID)	1	8	-	Western Sahara	Offshore	Surveys: May to Oct 2015, Feb + Aug-Dec 2016, Jun-Sep 2017	Correia et al. 2019	-	see sheet "CETUS Data - details"
Balaenoptera borealis or edeni (unconf. ID)	53	1-25	1	Mauritania	-	15 November 2012 to 14 January 2013	Baines & Reichelt 2014	-	-
Balaenoptera borealis or edeni (unconf. ID)	3	1-1	-	Mauritania	-	November/December 2012	Camphuysen et al. 2012	-	-
Balaenoptera borealis or musculus or physalus (unconf. ID)	2	2,3	-	Mauritania	-	24 January 2000	Camphuysen 2000	-	-
Balaenoptera borealis or musculus or physalus (unconf. ID)	3	1-1	-	Mauritania	-	November/December 2012	Camphuysen et al. 2012	-	-
Balaenoptera edeni	-	-	1	Guinea	Ile de Loos	29 July 2002	Bamy et al. 2010	-	-
Balaenoptera edeni	-	-	1	Guinea	Koukoubaya	21 May 2001	Bamy et al. 2010; Weir & Pierce 2013	-	-
Balaenoptera edeni	1	1	-	Mauritania	-	November/December 2012	Camphuysen et al. 2012	-	-
Balaenoptera edeni	-	-	1	Senegal	Dakar	26 March 1955	Van Waerebeek et al. 2000	-	-
Balaenoptera edeni	-	-	1	Senegal	Ngazobil	4 May 2000	Weir & Pierce 2013	Van Waerebeek et al. 2003	-
Balaenoptera edeni	2	1,1	-	Mauritania	off Nouakchott	2 September to 1 December 2012	Russel et al. 2018	-	-
Balaenoptera edeni	1	2	-	Mauritania	Offshore	Surveys: May to Oct 2015, Feb + Aug-Dec 2016, Jun-Sep 2017	Correia et al. 2019	-	see sheet "CETUS Data - details"
Balaenoptera edeni (unconf. ID)	3	1-1	-	Mauritania	-	November/December 2012	Camphuysen et al. 2012	-	-
Balaenoptera edeni (unconf. state of occurrence)	3	1-2	-	between Morocco and Guinea	-	21 October 2011 to 22 May 2013	Djiba et al. 2015	-	-
Balaenoptera musculus	8	1-2	-	Mauritania	-	15 November 2012 to 14 January 2013	Baines & Reichelt 2014	-	-
Balaenoptera musculus	1	1	-	Mauritania	-	November/December 2012	Camphuysen et al. 2012	-	-
Balaenoptera musculus	1	3	-	The Gambia	-	21 October 2011 to 22 May 2013	Djiba et al. 2015	-	-
Balaenoptera musculus	1	1	-	Mauritania	18°10'N ; 18°W	10 November 1947	Djiba et al. 2015	Kirpichnikov 1950; Tomilin 1967	-
Balaenoptera musculus	1	3	-	Mauritania	18°10'N ; 18°W	10 November 1947	Djiba et al. 2015	Kirpichnikov 1950; Tomilin 1967	-
Balaenoptera musculus	1	1	-	Mauritania	19°22.44'N ; 17°4.2'W	4 December 2012	Djiba et al. 2015	-	-
Balaenoptera musculus	6	-	-	Mauritania	off Nouakchott	2 September to 1 December 2012	Russel et al. 2018	-	-
Balaenoptera musculus	1	2	-	Mauritania	Offshore	Surveys: May to Oct 2015, Feb + Aug-Dec 2016, Jun-Sep 2017	Correia et al. 2019	-	see sheet "CETUS Data - details"
Balaenoptera musculus (unconf. ID)	1	1	-	Mauritania	-	November/December 2012	Camphuysen et al. 2012	-	-
Balaenoptera musculus (unconf. ID)	1	1	-	Senegal	Malika beach, Dakar	5 May 1943	Djiba et al. 2015	Cadenat 1947	-
Balaenoptera musculus (unconf. ID)	-	-	1	Western Sahara	Rio de Oro	(unspec. time period)	Djiba et al. 2015	Duguy 1976	-
Balaenoptera musculus (unconf. state of occurrence)	1	12	-	between Cape Verde and north Senegal	16°N	1 March 1911	Djiba et al. 2015	Kirpichnikov 1950	-
Balaenoptera omurai	-	-	1	Mauritania	7km south of Chott Boul	3 November 2013	Jung et al. 2016; Djiba et al. 2015	-	Jung et al. 2016 kept
Balaenoptera physalus	1	2	-	Mauritania	-	15 November 2012 to 14 January 2013	Baines & Reichelt 2014	-	-
Balaenoptera physalus	1	2	-	Morocco	-	April 2005	Boisseau et al. 2010	-	-
Balaenoptera physalus	1	6	-	Western Sahara	-	19 January 2000	Camphuysen 2000	-	-
Balaenoptera physalus	3	1-2	-	Mauritania	-	November/December 2012	Camphuysen et al. 2012	-	-
Balaenoptera physalus	-	-	1	Mauritania	Baie de l´Archimède	29 March 1971	Robineau & Vely 1998	Maigret 1980a	-
Balaenoptera physalus	-	-	1	Mauritania	Nouadhibou	23 March 1975	Robineau & Vely 1998; Weir & Pierce 2013	Maigret et al. 1976	-
Balaenoptera physalus	1	1	-	Mauritania	-	25 April 2004	Tulp & Leopold 2004	-	-
Balaenoptera physalus	-	-	1	Senegal	Sangomar	10 March 1979	Weir & Pierce 2013	Dupuy & Maigret 1980	-
Balaenoptera physalus	-	-	1	Morocco	Mediterranean Moroccan coast	1969	Rojo-Nieto et al. 2011	-	-
Balaenoptera physalus	-	-	5	Morocco	Mediterranean Moroccan coast	1991-1999	Rojo-Nieto et al. 2011	-	-
Balaenoptera physalus	-	-	8	Morocco	Mediterranean Moroccan coast	2000-2008	Rojo-Nieto et al. 2011	-	-
Balaenoptera physalus	2	1,1	-	Western Sahara	Offshore	Surveys: May to Oct 2015, Feb + Aug-Dec 2016, Jun-Sep 2017	Correia et al. 2019	-	see sheet "CETUS Data - details"
Balaenoptera physalus	2	1,4	-	Senegal	Offshore	Surveys: May to Oct 2015, Feb + Aug-Dec 2016, Jun-Sep 2017	Correia et al. 2019	-	see sheet "CETUS Data - details"
Balaenoptera physalus	-	-	1	Morocco	Off Casablanca	Nov to Dec 2019	Lydersen et al. 2020	-	-
Balaenoptera physalus (unconf. ID)	-	-	1	Senegal	Dakar	25 May 1981	Van Waerebeek et al. 2000	-	-
Caperea marginata	-	-	1	The Gambia	-	January 1995	Tsai & Mead 2018	-	-
Delphinus delphis	14	max=500	-	Mauritania	-	15 November 2012 to 14 January 2013	Baines & Reichelt 2014	-	-
Delphinus delphis	4	mean=25	-	Morocco	-	April 2005	Boisseau et al. 2010	-	-
Delphinus delphis	5	1-500	-	Mauritania	-	12-20 March 2003	Bowman Bishaw Goham 2003	-	-
Delphinus delphis	1	8	-	Morocco	-	16 January 2000	Camphuysen 2000	-	-
Delphinus delphis	1	14	-	Morocco	-	17 January 2000	Camphuysen 2000	-	-
Delphinus delphis	4	max=45	-	Western Sahara	-	19 January 2000	Camphuysen 2000	-	-
Delphinus delphis	4	max=14	-	Mauritania	-	20 January 2000	Camphuysen 2000	-	-
Delphinus delphis	3	15-45	-	Mauritania	-	20 January 2000	Camphuysen 2000	-	-
Delphinus delphis	1	1	-	Mauritania	-	21 January 2000	Camphuysen 2000	-	-
Delphinus delphis	4	max=180	-	Mauritania	-	22 January 2000	Camphuysen 2000	-	-
Delphinus delphis	4	max=85	-	Mauritania	-	23 January 2000	Camphuysen 2000	-	-
Delphinus delphis	8	2-400	-	Mauritania	-	November/December 2012	Camphuysen et al. 2012	-	-
Delphinus delphis	1	10	-	Morocco	Offshore	Surveys: May to Oct 2015, Feb + Aug-Dec 2016, Jun-Sep 2017	Correia et al. 2019	-	see sheet "CETUS Data - details"
Delphinus delphis	10	1-300	-	Western Sahara	Offshore	Surveys: May to Oct 2015, Feb + Aug-Dec 2016, Jun-Sep 2017	Correia et al. 2019	-	see sheet "CETUS Data - details"
Delphinus delphis	8	5-500	-	Mauritania	Offshore	Surveys: May to Oct 2015, Feb + Aug-Dec 2016, Jun-Sep 2017	Correia et al. 2019	-	see sheet "CETUS Data - details"
Delphinus delphis	1	2500	-	Senegal	Offshore	Surveys: May to Oct 2015, Feb + Aug-Dec 2016, Jun-Sep 2017	Correia et al. 2019	-	see sheet "CETUS Data - details"
Delphinus delphis	-	-	52	Mauritania	-	1992 to 1995	Robineau & Vely 1998	-	-
Delphinus delphis	-	-	7	Mauritania	Nouakchott	9 October 1958	Robineau & Vely 1998	Cadenat 1959	-
Delphinus delphis	1	2	-	Mauritania	Banc d'Arguin	July 1974	Robineau & Vely 1998	Maigret et al. 1976	-
Delphinus delphis	-	-	2	Mauritania	Nouakchott	May 1980	Robineau & Vely 1998	Maigret 1980a	-
Delphinus delphis	4	12-60	-	Mauritania	Nouakchott	June to September 1980	Robineau & Vely 1998	Maigret 1980a	-
Delphinus delphis	-	-	22	Mauritania	17°N	19 June 1980	Robineau & Vely 1998; Weir & Pierce 2013	Maigret 1980a	-
Delphinus delphis	-	-	7	Morocco	Mediterranean Moroccan coast	1991-1999	Rojo-Nieto et al. 2011	-	-
Delphinus delphis	-	-	149	Morocco	Mediterranean Moroccan coast	2000-2008	Rojo-Nieto et al. 2011	-	-
Delphinus delphis	9	-	-	Mauritania	off Nouakchott	2 September to 1 December 2012	Russel et al. 2018	-	-
Delphinus delphis	-	-	74	Morocco	Mediterranean Moroccan coast	December 2002 to September 2003	Tudela et al. 2005	-	-
Delphinus delphis	3	15-50	-	Mauritania	-	17-24 April 2004	Tulp & Leopold 2004	-	-
Delphinus delphis	-	-	50	Senegal	Hann	June/July 1945	Van Waerebeek et al. 2000; Weir & Pierce 2013	Cadenat 1949	-
Delphinus delphis	-	-	1	Senegal	Yenn	10 November 1955	Weir & Pierce 2013	Cadenat 1957	-
Delphinus delphis	-	-	1	Senegal	Joal	21 December 1955	Weir & Pierce 2013	Cadenat 1957	-
Delphinus delphis	-	-	1	Senegal	Yenn	8 October 1956	Weir & Pierce 2013	Cadenat 1957	-
Delphinus delphis	-	-	7	Senegal	Dakar	15 September 1958	Weir & Pierce 2013	Cadenat 1959	-
Delphinus delphis	-	-	1	Mauritania	Banc d'Arguin	July 1981	Weir & Pierce 2013	Maigret 1981a	-
Delphinus delphis	-	-	1	Senegal	Dakar	Summer 1945	Weir & Pierce 2013	Cadenat 1959	-
Delphinus delphis	-	-	2	Senegal	Joal	2000	Weir & Pierce 2013	Van Waerebeek et al. 2003	-
Delphinus delphis	-	-	5	Senegal	Joal, Fadiouth and Palmarin-Ngallou	15 December 2000 to 18 March 2001	Weir & Pierce 2013	Van Waerebeek et al. 2003	-
Delphinus delphis	-	-	95	Mauritania	-	1990 to 2008 (unspec. time period)	Pinela et al. 2010	-	-
Delphinus delphis	-	-	158	Senegal	-	1948 to 1981 (1993?)	Van Waerebeek et al. 2000	-	See ref paper for details on dates&region
Delphinus delphis	-	-	15	Senegal	Yenn	(unspec. time period)	Weir & Pierce 2013	Cadenat 1957	-
Delphinus delphis (unconf ID)	2	15.25	-	Mauritania	-	21 January 2000	Camphuysen 2000	-	-
Delphinus delphis (unconf. ID and location)	-	-	1	-	-	(unspec. time period)	Van Waerebeek et al. 2000	-	-
Delphinus delphis (unconf. ID)	-	-	1	Senegal	Cap Vert	7 November 1997	Van Waerebeek et al. 2000	-	-
Delphinus delphis (unconf. ID)	-	-	3	Senegal	-	(unspec. time period)	Van Waerebeek et al. 2000	-	-
Delphinus delphis (unconf. location)	2	-	-	West Africa	-	(unspec. time period)	Weir et al. 2014	-	-
Delphinus delphis (unconf. location)	-	-	11	-	-	1953, 1958 and 1993?	Van Waerebeek et al. 2000	-	See ref paper for details on dates
Delphinus delphis (unconf. state of occurrence)	89	2-450	-	Morocco to Guinea	-	21 October 2011 to 22 May 2013	Djiba et al. 2015	-	-
Delphinus delphis (unconf. state of occurrence)	5	max=30	-	Morocco or Western Sahara	-	18 January 2000	Camphuysen 2000	-	-
Delphinus delphis + Tursiops truncatus	-	-	10	Mauritania	-	1980 to 1982	Weir & Pierce 2013	Maigret 1994	-
Delphinus delphis or Stenella coeruleoalba (unconf. ID)	-	-	75	Morocco	Mediterranean Moroccan coast	December 2002 to September 2003	Tudela et al. 2005	-	-
Delphinus delphis or Stenella coeruleoalba (unconf. ID)	1	2	-	Morocco	-	16 January 2000	Camphuysen 2000	-	-
Feresa attenuata	-	-	1	Senegal	Yenn	April 1958	Van Waerebeek et al. 2000	Cadenat 1958	-
Globicephala macrorhynchus	1	-	-	Guinea	-	(unspec. time period)	Bamy et al. 2010; Djiba et al. 2015	-	-
Globicephala macrorhynchus	9	-	-	Mauritania	-	15 November 2012 to 14 January 2013	Baines & Reichelt 2014	-	-
Globicephala macrorhynchus	1	25	-	Mauritania	-	22 January 2000	Camphuysen 2000	-	-
Globicephala macrorhynchus	1	25	-	Mauritania	-	23 January 2000	Camphuysen 2000	-	-
Globicephala macrorhynchus	2	10,30	-	Guinea-Bissau	11º47.228'N, 17º25.728'W; 12º0.051'N, 17º25.725'W	15 May 2013	Djiba et al. 2015	-	-
Globicephala macrorhynchus	3	-	-	Guinea	-	21 October 2011 to 25 May 2012	Djiba et al. 2015	-	-
Globicephala macrorhynchus	-	-	15	Senegal	Yoff	17 August 2005	Djiba et al. 2015	-	-
Globicephala macrorhynchus	1	7	-	Liberia	6.14442ºN; 11.11383ºW	18 March 2009	Gray & Van Waerebeek 2011	-	-
Globicephala macrorhynchus	-	-	1	Mauritania	-	November 2012 to May 2013	Mullié et al. 2013	-	-
Globicephala macrorhynchus	-	-	3	Mauritania	-	1992 to 1995	Robineau & Vely 1998	-	-
Globicephala macrorhynchus	-	-	2	Senegal	Barbarie and Mboro	21 May 1977 and 1993	Van Waerebeek et al. 2000	-	-
Globicephala macrorhynchus	-	-	2	Senegal	Yoff and Yenn	1961	Van Waerebeek et al. 2000	-	-
Globicephala macrorhynchus	-	-	1	Senegal	Dakar	11 October 1997	Van Waerebeek et al. 2000	-	-
Globicephala macrorhynchus	-	-	1	Senegal	Dakar	9 October 1997	Van Waerebeek et al. 2000; Weir & Pierce 2013	-	-
Globicephala macrorhynchus	-	-	151	Senegal	Yoff	20 May 1943	Van Waerebeek et al. 2000; Weir & Pierce 2013; Djiba et al. 2015	Cadenat 1947	-
Globicephala macrorhynchus	-	-	1	The Gambia	Saniang Point	January 1998	Van Waerebeek et al. 2000; Weir & Pierce 2013; Djiba et al. 2015	Murphy et al. 1997; Jallow et al. 2005	-
Globicephala macrorhynchus	49	-	-	Mauritania	off Nouakchott	2 September to 1 December 2012	Russel et al. 2018	-	-
Globicephala macrorhynchus	2	-	-	Guinea-Bissau	-	(unspec. time period)	Leeney et al. 2016	-	-
Globicephala macrorhynchus	-	-	9	Mauritania	-	1990 to 2008 (unspec. time period)	Pinela et al. 2010	-	-
Globicephala macrorhynchus	-	-	1	Mauritania	Baie du Lévrier	(unspec. time period)	Robineau & Vely 1998	Maigret 1980a	-
Globicephala macrorhynchus	-	-	5	Senegal	-	(unspec. time period)	Van Waerebeek et al. 2000	-	-
Globicephala macrorhynchus (unconf. ID)	-	-	1	Senegal	-	(unspec. time period)	Van Waerebeek et al. 2000	-	-
Globicephala macrorhynchus (unconf. location)	-	-	1	-	-	(unspec. time period)	Van Waerebeek et al. 2000	-	-
Globicephala macrorhynchus (unconf. state of occurrence)	4	max=10	-	Morocco or Western Sahara	-	18 January 2000	Camphuysen 2000	-	-
Globicephala melas	2	8,14	-	Mauritania	-	20 January 2000	Camphuysen 2000	-	-
Globicephala melas	-	-	2	Mauritania	-	November 2012 to May 2013	Mullié et al. 2013	-	-
Globicephala melas	-	-	5	Mauritania	-	1992 to 1995	Robineau & Vely 1998	-	-
Globicephala melas	1	-	-	Mauritania	-	August 1971	Robineau & Vely 1998	Maigret et al. 1976	-
Globicephala melas	-	-	1	Mauritania	Nouakchott (17°13'83''N)	June 1975	Robineau & Vely 1998	-	-
Globicephala melas	-	-	1	Morocco	Mediterranean Moroccan coast	1962	Rojo-Nieto et al. 2011	-	-
Globicephala melas	-	-	3	Morocco	Mediterranean Moroccan coast	1991-1999	Rojo-Nieto et al. 2011	-	-
Globicephala melas	-	-	13	Morocco	Mediterranean Moroccan coast	2000-2008	Rojo-Nieto et al. 2011	-	-
Globicephala melas	-	-	2	Mauritania	-	1990 to 2008 (unspec. time period)	Pinela et al. 2010	-	-
Globicephala melas (unconf. ID)	1	-	-	Mauritania	21°24´N ; 17°42´W	13 July 1973	Robineau & Vely 1998	Duguy 1976	-
Globicephala sp.	1	4	-	Morocco	-	21 October 2011 to 22 May 2013	Djiba et al. 2015	-	-
Globicephala sp.	1	15	-	Morocco	33°55.400'N ; 8°54.550'W	10 September 2010	Expósito & Qninba 2010	-	-
Globicephala sp.	1	3-4	-	Guinea-Bissau	Cabo Roxo	10 January 1998	Van Waerebeek et al. 2000; Leneey et al. 2016	-	-
Globicephala sp.	1	-	-	Guinea-Bissau	Cabo Roxo	10 January 1998	Van Waerebeek et al. 2000; Leneey et al. 2016	-	-
Globicephala sp.	-	-	9	Mauritania	-	2001 to 2004	Weir & Pierce 2013	Zeeberg et al. 2006	-
Globicephala sp.	1	20	-	Mauritania	-	19 April 2004	Tulp & Leopold 2004	-	-
Globicephala sp. (unconf. state of occurrence)	1	-	-	between Morocco and Guinea	-	21 October 2011 to 22 May 2013	Djiba et al. 2015	-	-
Gobicephala sp.	21	2-100	-	Western Sahara	Offshore	Surveys: May to Oct 2015, Feb + Aug-Dec 2016, Jun-Sep 2017	Correia et al. 2019	-	see sheet "CETUS Data - details"
Gobicephala sp.	6	15-50	-	Mauritania	Offshore	Surveys: May to Oct 2015, Feb + Aug-Dec 2016, Jun-Sep 2017	Correia et al. 2019	-	see sheet "CETUS Data - details"
Grampus griseus	-	-	1	Mauritania	-	(unspec. time period)	Djiba et al. 2015	Duguy, 1976	-
Grampus griseus	3	-	-	Mauritania	-	15 November 2012 to 14 January 2013	Baines & Reichelt 2014	-	-
Grampus griseus	3	4-7	-	Mauritania	-	11-22 March 2003	Bowman Bishaw Goham 2003	-	-
Grampus griseus	2	9,11	-	Mauritania	-	November/December 2012	Camphuysen et al. 2012	-	-
Grampus griseus	2	3,15	-	Morocco	-	21 October 2011 to 22 May 2013	Djiba et al. 2015	-	-
Grampus griseus	1	9	-	Mauritania	18°7.50'N ; 16°42.36'W	6 December 2012	Djiba et al. 2015	-	-
Grampus griseus	-	-	5	Mauritania	-	1992 to 1995	Robineau & Vely 1998	-	-
Grampus griseus	-	-	1	Mauritania	Nouâmghâr	1973	Robineau & Vely 1998	Duguy 1976	-
Grampus griseus	1	6	-	Guinea-Bissau	-	13 January 1998	Van Waerebeek et al. 2000; Leeney et al. 2016	-	-
Grampus griseus	8	-	-	Mauritania	off Nouakchott	2 September to 1 December 2012	Russel et al. 2018	-	-
Grampus griseus	-	-	1	Morocco	Mediterranean Moroccan coast	1974	Rojo-Nieto et al. 2011	-	-
Grampus griseus	1	15	-	Western Sahara	Offshore	Surveys: May to Oct 2015, Feb + Aug-Dec 2016, Jun-Sep 2017	Correia et al. 2019	-	see sheet "CETUS Data - details"
Grampus griseus	2	10,6	-	Mauritania	Offshore	Surveys: May to Oct 2015, Feb + Aug-Dec 2016, Jun-Sep 2017	Correia et al. 2019	-	see sheet "CETUS Data - details"
Grampus griseus	-	-	1	Mauritania	-	1990 to 2008 (unspec. time period)	Pinela et al. 2010	-	-
Grampus griseus (unconf. ID)	1	3	-	Morocco	-	21 October 2011 to 22 May 2013	Djiba et al. 2015	-	-
Grampus griseus (unconf. ID)	-	-	1	Morocco	Agadir	1984	Robineau & Vely 1998; Djiba et al. 2015	Bayed & Beaubrun 1987	-
Hyperoodon ampullatus (unconf. ID)	3	1-3	-	Mauritania	-	22 January 2000	Camphuysen 2000	-	-
Kogia breviceps	-	-	1	Guinea	Tanéné	3 May 2002	Bamy et al. 2010; Weir & Pierce 2013	Bamy et al. 2006	-
Kogia breviceps	-	-	2	Mauritania	-	1992 to 1995	Robineau & Vely 1998	-	-
Kogia breviceps	-	-	2	Senegal	Dakar	July 1957	Van Waerebeek et al. 2000	Cadenat 1959	-
Kogia breviceps	-	-	2	Senegal	Rufisque	12 May 1965	Van Waerebeek et al. 2000	Maigret & Robineau 1981	-
Kogia sima	-	-	1	Senegal	Cap Manuel	1 December 1977	Van Waerebeek et al. 2000	Maigret & Robineau 1981	-
Kogia sima	-	-	1	Morocco	Mnar, Tanger	2015-04-30	Benchoucha et al. 2018	-	-
Kogia sima	2	1,1	-	Mauritania	off Nouakchott	2 September to 1 December 2012	Russel et al. 2018	-	-
Kogia sima	-	-	1	Senegal	Pointe de Fann	(unspec. time period)	Van Waerebeek et al. 2000	Maigret & Robineau 1981	-
Kogia sp.	1	1	-	Western Sahara	Offshore	Surveys: May to Oct 2015, Feb + Aug-Dec 2016, Jun-Sep 2017	Correia et al. 2019	-	see sheet "CETUS Data - details"
Lagenodelphis hosei	-	-	1	Senegal	Sangomar	17 November 1997	Van Waerebeek et al. 2000; Djiba et al. 2015	-	-
Lagenodelphis hosei	1	450	-	Senegal	Offshore	Surveys: May to Oct 2015, Feb + Aug-Dec 2016, Jun-Sep 2017	Correia et al. 2019	-	see sheet "CETUS Data - details"
Lagenodelphis hosei (unconf. ID)	1	-	-	Sierra Leone	-	(unspec. time period)	Jefferson et al. 1997	Tormosov et al. 1980	-
Lagenorhynchus acutus	1	-	-	Morocco	Strait of Gibraltar	(unspec. time period)	Jefferson et al. 1997	Castells & Mayo, 1992	-
Lagenorhynchus albirostris	6	-	-	Morocco	Strait of Gibraltar	(unspec. time period)	Jefferson et al. 1997	Castells & Mayo, 1992	-
Lagenorhynchus sp. (unconf. ID)	-	-	1	Senegal	-	(unspec. time period)	Jefferson et al. 1997	Cadenat 1949	-
Megaptera novaeangliae	1	-	-	Guinea-Bissau	mouth of Rio Cacheu	(unspec. time period)	Leeney et al. 2016	Brown 1959	-
Megaptera novaeangliae	1	1	-	Mauritania	-	15 November 2012 to 14 January 2013	Baines & Reichelt 2014	-	-
Megaptera novaeangliae	-	-	1	Guinea	Conakry	26 September 2005	Bamy et al. 2010	-	-
Megaptera novaeangliae	-	-	1	Guinea	Taboriya	22 July 2008	Bamy et al. 2010	-	-
Megaptera novaeangliae	1	1	-	Guinea	-	1 October 2002	Bamy et al. 2010	-	-
Megaptera novaeangliae	3	1-2	-	Mauritania	-	November/December 2012	Camphuysen et al. 2012	-	-
Megaptera novaeangliae	1	-	-	Guinea-Bissau	Bibaque channel	30 September 2009	Leeney et al. 2016	Hazevoet et al. 2011	-
Megaptera novaeangliae	-	-	1	Mauritania	Port-Etienne	February 1954	Robineau & Vely 1998; Weir & Pierce 2013	Cadenat 1955	-
Megaptera novaeangliae	1	1	-	Mauritania	-	23 April 2004	Tulp & Leopold 2004	-	-
Megaptera novaeangliae	6	1-6	-	Guinea	-	21 October to 23 October 2011	Van Waerebeek et al. 2013; Djiba et al. 2015	-	-
Megaptera novaeangliae	6	1-2	-	Guinea-Bissau	-	28 October to 30 October 2011	Van Waerebeek et al. 2013; Djiba et al. 2015	-	-
Megaptera novaeangliae	1	1	-	The Gambia	-	2 November 2011	Van Waerebeek et al. 2013; Djiba et al. 2015	-	-
Megaptera novaeangliae	4	1-3	-	Senegal	-	31 October to 1 November and 5 November 2011	Van Waerebeek et al. 2013; Djiba et al. 2015	-	-
Megaptera novaeangliae	3	-	-	Mauritania	off Nouakchott	2 September to 1 December 2012	Russel et al. 2018	-	-
Megaptera novaeangliae	-	-	2	Morocco	Mediterranean Moroccan coast	2004, 2008	Rojo-Nieto et al. 2011	-	-
Megaptera novaeangliae	2	1,1	-	Western Sahara	Offshore	Surveys: May to Oct 2015, Feb + Aug-Dec 2016, Jun-Sep 2017	Correia et al. 2019	-	see sheet "CETUS Data - details"
Megaptera novaeangliae	4	1-3	-	Mauritania	Offshore	Surveys: May to Oct 2015, Feb + Aug-Dec 2016, Jun-Sep 2017	Correia et al. 2019	-	see sheet "CETUS Data - details"
Megaptera novaeangliae	1	-	-	Morocco	-	(unspec. time period)	Robineau & Vely 1998	Aloncle 1967	-
Megaptera novaeangliae (unconf. ID and state of occurrence)	24	-	-	between Mauritania and Liberia	Offshore	Jan 2003 to Dec 2016 (unspec. time period)	Báez et al. 2020	-	-
Megaptera novaeangliae (unconf. ID)	-	-	1	Mauritania	-	November 2012 to May 2013	Mullié et al. 2013	-	-
Megaptera novaeangliae (unconf. ID)	2	2,5	-	Guinea	-	21 and 23 October 2011	Van Waerebeek et al. 2013; Djiba et al. 2015	-	-
Megaptera novaeangliae (unconf. ID)	1	1	-	The Gambia	-	2 November 2011	Van Waerebeek et al. 2013; Djiba et al. 2015	-	-
Megaptera novaeangliae (unconf. ID)	1	2	-	Senegal	-	5 November 2011	Van Waerebeek et al. 2013; Djiba et al. 2015	-	-
Mesoplodon densirostris	-	-	1	Mauritania	-	1992 to 1995	Robineau & Vely 1998	-	-
Mesoplodon europaeus	-	-	1	Mauritania	-	1992 to 1995	Robineau & Vely 1998; Van Waerebeek et al. 2000	Robineau & Vely 1993	-
Mesoplodon europaeus	-	-	1	Guinea-Bissau	-	1979	Robineau & Vely 1998; Van Waerebeek et al. 2000; Leneey et al. 2016	Reiner 1980	-
Mesoplodon europaeus	1	2	-	Western Sahara	Offshore	Surveys: May to Oct 2015, Feb + Aug-Dec 2016, Jun-Sep 2017	Correia et al. 2019	-	see sheet "CETUS Data - details"
Mesoplodon sp.	1	1	-	Guinea	-	21 October 2011 to 22 May 2013	Djiba et al. 2015	-	-
Mesoplodon sp.	1	3	-	Mauritania	-	November/December 2012	Camphuysen et al. 2012	-	-
NI baleen whale	2	1,1	-	Morocco	Offshore	Surveys: May to Oct 2015, Feb + Aug-Dec 2016, Jun-Sep 2017	Correia et al. 2019	-	see sheet "CETUS Data - details"
NI baleen whale	21	1-5	-	Western Sahara	Offshore	Surveys: May to Oct 2015, Feb + Aug-Dec 2016, Jun-Sep 2017	Correia et al. 2019	-	see sheet "CETUS Data - details"
NI baleen whale	6	1-1	-	Mauritania	Offshore	Surveys: May to Oct 2015, Feb + Aug-Dec 2016, Jun-Sep 2017	Correia et al. 2019	-	see sheet "CETUS Data - details"
NI baleen whale	69	1-25	1	Mauritania	-	15 November 2012 to 14 January 2013	Baines & Reichelt 2014	-	-
NI baleen whale	-	-	1	Guinea	Kamsar	October 2001	Bamy et al. 2010	-	-
NI baleen whale	-	-	2	Mauritania	-	November 2012 to May 2013	Mullié et al. 2013	-	-
NI baleen whale	-	-	2	Mauritania	-	1992 to 1995	Robineau & Vely 1998	-	-
NI baleen whale	-	-	1	Mauritania	Pointe de l´Archimède	21 March 1980	Robineau & Vely 1998	Maigret 1981b	-
NI baleen whale	-	-	4	Senegal	Dakar	26 March 1998	Van Waerebeek et al. 2000	-	-
NI baleen whale	-	-	1	Guinea-Bissau	Rio Cacheu	April 1997	Van Waerebeek et al. 2000; Leeney et al. 2016	-	-
NI baleen whale	34	-	-	Mauritania	off Nouakchott	2 September to 1 December 2012	Russel et al. 2018	-	-
NI baleen whale	-	-	1	Mauritania	Nouâmghâr	(unspec. time period)	Robineau & Vely 1998	Maigret 1981b	-
NI baleen whale (unconf. location)	-	-	1	-	-	(unspec. time period)	Van Waerebeek et al. 2000	-	-
NI baleen whale (unconf. state of occurrence)	16	-	-	between Morocco and Guinea	-	21 October 2011 to 22 May 2013	Djiba et al. 2015	-	-
NI beaked whale	14	1-5	-	Western Sahara	Offshore	Surveys: May to Oct 2015, Feb + Aug-Dec 2016, Jun-Sep 2017	Correia et al. 2019	-	see sheet "CETUS Data - details"
NI beaked whale	2	1,1	-	Mauritania	Offshore	Surveys: May to Oct 2015, Feb + Aug-Dec 2016, Jun-Sep 2017	Correia et al. 2019	-	see sheet "CETUS Data - details"
NI cetacean	20	1-8	-	Mauritania	Offshore	Surveys: May to Oct 2015, Feb + Aug-Dec 2016, Jun-Sep 2017	Correia et al. 2019	-	see sheet "CETUS Data - details"
NI cetacean	3	1-1	-	Mauritania	-	April 2004	Tulp & Leopold 2004	-	-
NI cetacean	48	1-50	-	Western Sahara	Offshore	Surveys: May to Oct 2015, Feb + Aug-Dec 2016, Jun-Sep 2017	Correia et al. 2019	-	see sheet "CETUS Data - details"
NI cetacean	-	-	1	Mauritania	-	November 2012 to May 2013	Mullié et al. 2013	-	-
NI cetacean	-	-	1	Senegal	Cap Vert	22 June 1995	Van Waerebeek et al. 2000	-	-
NI cetacean	1	1	-	Senegal	M'Bodiene	24 July 1998	Van Waerebeek et al. 2000	-	-
NI cetacean	1	1	-	Senegal	Petite Cote	7 August 1998	Van Waerebeek et al. 2000	-	-
NI cetacean	2	1,1	-	Morocco	Offshore	Surveys: May to Oct 2015, Feb + Aug-Dec 2016, Jun-Sep 2017	Correia et al. 2019	-	see sheet "CETUS Data - details"
NI cetacean	-	-	2	Senegal	-	(unspec. time period)	Van Waerebeek et al. 2000	-	-
NI cetacean (whale)	6	min=1	-	Mauritania	-	15 November 2012 to 14 January 2013	Baines & Reichelt 2014	-	-
NI cetacean (whale)	1	1	-	Western Sahara	-	19 January 2000	Camphuysen 2000	-	-
NI cetacean (whale)	1	1	-	Mauritania	-	24 January 2000	Camphuysen 2000	-	-
NI cetacean (whale)	-	-	1	Mauritania	Cap Timiris	March 1989	Weir & Pierce 2013	Maigret 1994	-
NI cetacean (whale)	-	-	1	Mauritania	Cap Timiris	September 1989	Weir & Pierce 2013	Maigret 1994	-
NI cetacean (whale)	4	mean=1	-	Morocco	-	April 2005	Boisseau et al. 2010	-	-
NI cetacean (whale)	2	2,2	-	Mauritania	-	11-22 March 2003	Bowman Bishaw Goham 2003	-	-
NI cetacean (whale)	6	1-1	-	Mauritania	-	November/December 2012	Camphuysen et al. 2012	-	-
NI cetacean (whale)	-	-	1	Mauritania	-	November 2012 to May 2013	Mullié et al. 2013	-	-
NI cetacean (whale)	1	1	-	Senegal	Casamance	26 August 1998	Van Waerebeek et al. 2000	-	-
NI cetacean (whale)	1	1	-	The Gambia	-	September 1996	Van Waerebeek et al. 2000	-	-
NI cetacean (whale)	-	-	2	The Gambia	-	1980 to 2000 (unspec. time period)	Van Waerebeek et al. 2000	Murphy et al. 1997	-
NI cetacean (whale) (unconf. state of occurence)	13	-	-	between Morocco and Guinea	-	21 October 2011 to 22 May 2013	Djiba et al. 2015	-	-
NI dolphin	1	3	-	Western Sahara	-	19 January 2000	Camphuysen 2000	-	-
NI dolphin	1	5	-	Mauritania	-	20 January 2000	Camphuysen 2000	-	-
NI dolphin	1	3	-	Mauritania	-	22 January 2000	Camphuysen 2000	-	-
NI dolphin	1	10	-	Mauritania	-	23 January 2000	Camphuysen 2000	-	-
NI dolphin	-	-	1	Senegal	Sangomar	17 November 1997	Van Waerebeek et al. 2000	-	-
NI dolphin	1	200	-	Liberia	6.05122ºN; 10.90085ºW	18 March 2009	Gray & Van Waerebeek 2011	-	-
NI dolphin	1	300	-	Liberia	6.01798ºN; 10.96295ºW	18 March 2009	Gray & Van Waerebeek 2011	-	-
NI dolphin	1	200	-	Liberia	6.1499ºN; 11.11675ºW	18 March 2009	Gray & Van Waerebeek 2011	-	-
NI dolphin	25	-	-	Mauritania	-	15 November 2012 to 14 January 2013	Baines & Reichelt 2014	-	-
NI dolphin	4	mean=10	-	Morocco	-	April 2005	Boisseau et al. 2010	-	-
NI dolphin	5	1-5	-	Mauritania	-	November/December 2012	Camphuysen et al. 2012	-	-
NI dolphin	-	-	1	Senegal	Yoff	27 February 1977	Van Waerebeek et al. 2000	-	-
NI dolphin	-	-	2	Senegal	Palmarin	24 November 1996	Van Waerebeek et al. 2000	-	-
NI dolphin	-	-	1	Senegal	Cap Vert	26 November 1996	Van Waerebeek et al. 2000	-	-
NI dolphin	-	-	1	Senegal	Saint Louis	24 October 1997	Van Waerebeek et al. 2000	-	-
NI dolphin	-	-	1	Senegal	Cap Vert	6 November 1997	Van Waerebeek et al. 2000	-	-
NI dolphin	-	-	3	Senegal	Cap Vert	7 November 1997	Van Waerebeek et al. 2000	-	-
NI dolphin	-	-	1	Senegal	Cap Vert	10 August 1998	Van Waerebeek et al. 2000	-	-
NI dolphin	-	-	3	Senegal	Palmarin	16 October 1997	Van Waerebeek et al. 2000	-	-
NI dolphin	-	-	2	Senegal	Niodior	19 October 1997	Van Waerebeek et al. 2000	-	-
NI dolphin	1	35	-	Senegal	Saloum	13 August 1998	Van Waerebeek et al. 2000	-	-
NI dolphin	1	8	-	Senegal	Saloum	17 August 1998	Van Waerebeek et al. 2000	-	-
NI dolphin	1	-	-	Senegal	Saloum Delta	19 August 1998	Van Waerebeek et al. 2000	-	-
NI dolphin	10	1-4	-	Guinea-Bissau	-	8 October 1995 to 12 March 1996	Van Waerebeek et al. 2000	-	-
NI dolphin	-	-	1	The Gambia	off Gunjur	1996	Van Waerebeek et al. 2000; Weir & Pierce 2013	Murphy et al. 1997	-
NI dolphin	-	-	1	Senegal	Dakar	February 1959	Weir & Pierce 2013	Cadenat 1959	-
NI dolphin	-	-	91	Mauritania	-	2001 to 2004	Weir & Pierce 2013	Zeeberg et al. 2006	-
NI dolphin	-	-	44	Senegal	Joal, Casamance	October 1948 to December 1950	Weir & Pierce 2013	Cadenat 1957	-
NI dolphin	-	-	1	Senegal	Sangomar	19 October 1979	Weir & Pierce 2013	Dupuy & Maigret 1980	-
NI dolphin	49	-	-	Mauritania	off Nouakchott	2 September to 1 December 2012	Russel et al. 2018	-	-
NI dolphin	-	-	1	Morocco	Mediterranean Moroccan coast	1967	Rojo-Nieto et al. 2011	-	-
NI dolphin	-	-	4	Morocco	Mediterranean Moroccan coast	1991-1999	Rojo-Nieto et al. 2011	-	-
NI dolphin	-	-	27	Morocco	Mediterranean Moroccan coast	2000-2008	Rojo-Nieto et al. 2011	-	-
NI dolphin	2	1,20	-	Morocco	Offshore	Surveys: May to Oct 2015, Feb + Aug-Dec 2016, Jun-Sep 2017	Correia et al. 2019	-	see sheet "CETUS Data - details"
NI dolphin	79	1-150	-	Western Sahara	Offshore	Surveys: May to Oct 2015, Feb + Aug-Dec 2016, Jun-Sep 2017	Correia et al. 2019	-	see sheet "CETUS Data - details"
NI dolphin	23	1-80	-	Mauritania	Offshore	Surveys: May to Oct 2015, Feb + Aug-Dec 2016, Jun-Sep 2017	Correia et al. 2019	-	see sheet "CETUS Data - details"
NI dolphin (unconf. location)	-	-	2	Senegal	-	(unspec. time period)	Van Waerebeek et al. 2000	-	-
NI dolphin (unconf. state of occurrence)	22	-	-	between Mauritania and Liberia	Offshore	Jan 2003 to Dec 2016 (unspec. time period)	Báez et al. 2020	-	-
NI dolphin (unconf. state of occurrence)	68	-	-	between Morocco and Guinea	-	21 October 2011 to 22 May 2013	Djiba et al. 2015	-	-
NI dolphin (unconf. state of occurrence)	1	2	-	Morocco or Western Sahara	-	18 January 2000	Camphuysen 2000	-	-
Orcinus orca	6	1-2	-	Senegal	-	(unspec. time period)	Djiba et al. 2015	Maigret 1977	-
Orcinus orca	17	-	-	Senegal	Cap Vert	(unspec. time period)	Djiba et al. 2015	Maigret 1977	-
Orcinus orca	1	4	-	Mauritania	-	23 April 2004	Tulp & Leopold 2004	-	-
Orcinus orca	1	7	-	Mauritania	-	15 November 2012 to 14 January 2013	Baines & Reichelt 2014	-	-
Orcinus orca	1	3	-	Senegal	14º51.587'N; 17º15.959'W	9 May 2013	Djiba et al. 2015	-	-
Orcinus orca	1	5	-	Senegal	15º46.995'N; 17º19.154'W	10 May 2013	Djiba et al. 2015	-	-
Orcinus orca	1	5	-	The Gambia	13º24.701'N; 17º33'W	13 May 2013	Djiba et al. 2015	-	-
Orcinus orca	-	-	3	Mauritania	-	1990 to 2008 (unspec. time period)	Pinela et al. 2010	-	-
Orcinus orca	1	-	-	Senegal	Joal	2012	Djiba et al. 2015	-	-
Orcinus orca	1	1	-	Liberia	4º20'N ; 8º55'W	16 October 1972	Hammond & Lockyer 1988	-	-
Orcinus orca	1	2	-	Morocco	Tanger	24 July 1984	Hammond & Lockyer 1988	Bayed & Beaubrun 1987	-
Orcinus orca	2*	3-4	-	Morocco	Tanger	May/June 1980	Hammond & Lockyer 1988	-	*same two groups sighted several times
Orcinus orca	1	3	-	Morocco	La Gwera	19 November 1977	Hammond & Lockyer 1988	Trotignon 1979	-
Orcinus orca	1	2	-	Senegal	Dakar	16 May 1956	Hammond & Lockyer 1988	Cadenat 1957	-
Orcinus orca	1*	2	-	Senegal	Kayar	22-23 October 1956	Hammond & Lockyer 1988	Cadenat 1957	*same pair sighted several times
Orcinus orca	6	1-4	4	Senegal	-	1954 to 1980	Hammond & Lockyer 1988	-	-
Orcinus orca	1	15	-	Mauritania	Baie du Lévrier	29 April 1958	Hammond & Lockyer 1988	Cadenat 1959	-
Orcinus orca	22	1-6	3	Mauritania	-	1958 to 1982	Hammond & Lockyer 1988	-	-
Orcinus orca	2	2,1	-	Senegal	Senegal river	July 1978 and July 1979	Hammond & Lockyer 1988; Djiba et al. 2015; Van Waerebeek et al. 2000	Maigret 1977	-
Orcinus orca	-	-	1	Mauritania	Baie du Lévrier	9 June 1954	Hammond & Lockyer 1988; Weir & Pierce 2013	Duguy 1976; Maigret 1990	-
Orcinus orca	2	2,3	2	Mauritania	-	1989 to 1995	Robineau & Vely 1998	-	-
Orcinus orca	-	-	1	Senegal	Camberene	June 1948	Van Waerebeek et al. 2000	Cadenat 1949	-
Orcinus orca	-	-	1	Senegal	Dakar	1960	Van Waerebeek et al. 2000; Weir & Pierce 2013	Dupuy 1974	-
Orcinus orca	-	-	1	Senegal	Hann	6 February 1942	Van Waerebeek et al. 2000; Weir & Pierce 2013; Djiba et al. 2015	Cadenat 1947, 1949	-
Orcinus orca	-	-	1	Senegal	Rufisque	1964	Weir & Pierce 2013	Dupuy & Maigret 1976; Maigret 1990	-
Orcinus orca	-	-	1	Guinea	009°15′N ; 018°24′W	20 February 1882	Weir & Pierce 2013; Leneey et al. 2016	Reeves & Mitchell 1988	-
Orcinus orca	4	2-5	-	Western Sahara	Offshore	Surveys: May to Oct 2015, Feb + Aug-Dec 2016, Jun-Sep 2017	Correia et al. 2019	-	see sheet "CETUS Data - details"
Orcinus orca	-	-	1	Senegal	-	1993?	Van Waerebeek et al. 2000	-	-
Orcinus orca	-	-	1	Senegal	-	(unspec. time period)	Van Waerebeek et al. 2000	-	-
Peponocephala electra	-	-	1	Guinea-Bissau	Bijagós Archipelago	(unspec. time period)	Jefferson et al. 1997; Robineau & Vely 1998; Van Waerebeek et al. 2000; Leeney et al. 2016	Duguy and van Bree 1977	-
Peponocephala electra	-	-	1	Senegal	Saloum Delta	1966	Jefferson et al. 1997; Robineau & Vely 1998; Van Waerebeek et al. 2000; Djiba et al. 2015	van Bree & Cadenat 1968	-
Peponocephala electra	-	-	1	Mauritania	-	January 1995	Robineau & Vely 1998	-	-
Peponocephala electra	3	3-200	-	Mauritania	Offshore	Surveys: May to Oct 2015, Feb + Aug-Dec 2016, Jun-Sep 2017	Correia et al. 2019	-	see sheet "CETUS Data - details"
Peponocephala electra	1	40	-	Senegal	Offshore	Surveys: May to Oct 2015, Feb + Aug-Dec 2016, Jun-Sep 2017	Correia et al. 2019	-	see sheet "CETUS Data - details"
Phocoena phocoena	-	-	42	Mauritania	-	1990 to 2008 (unspec. time period)	Pinela et al. 2010	-	-
Phocoena phocoena	2	1,1	-	Mauritania	-	15 November 2012 to 14 January 2013	Baines & Reichelt 2014	-	-
Phocoena phocoena	3	1-2	3	Morocco	-	Spring 2005	Boisseau et al. 2007; Boisseau et al. 2010	-	-
Phocoena phocoena	1	1-2	45	Western Sahara	-	Spring 2005	Boisseau et al. 2007; Boisseau et al. 2010	-	-
Phocoena phocoena	3	1-2	2	Mauritania	-	Spring 2005	Boisseau et al. 2007; Boisseau et al. 2010	-	-
Phocoena phocoena	4	1-1	-	Mauritania	-	November/December 2012	Camphuysen et al. 2012	-	-
Phocoena phocoena	-	-	12	Mauritania	-	November 2012 to May 2013	Mullié et al. 2013	-	-
Phocoena phocoena	-	-	51	Mauritania	-	1992 to 1995	Robineau & Vely 1998	-	-
Phocoena phocoena	1	11	-	Mauritania	-	30 April 2004	Tulp & Leopold 2004	-	-
Phocoena phocoena	-	-	2	Senegal	Hann	7 June 1949	Van Waerebeek et al. 2000; Weir & Pierce 2013	Cadenat 1949; Fraser 1958	-
Phocoena phocoena	-	-	1	Senegal	Fadiouth	January 1999	Van Waerebeek et al. 2000; Weir & Pierce 2013; Bamy et al. 2010	-	(COREWAM collection)
Phocoena phocoena	-	-	1	Mauritania	Nouadhibou	1951	Weir & Pierce 2013	Fraser 1958	-
Phocoena phocoena	-	-	1	Mauritania	-	1968	Weir & Pierce 2013	Duguy 1976	-
Phocoena phocoena	-	-	1	Senegal	Yenn	14 April 1956	Weir & Pierce 2013	Cadenat 1957	-
Phocoena phocoena	-	-	2	Senegal	Yenn	May 1956	Weir & Pierce 2013	Cadenat 1957	-
Phocoena phocoena	-	-	1	Mauritania	Nouadhibou	20 August 1973	Weir & Pierce 2013	Duguy 1976; Maigret et al. 1976	-
Phocoena phocoena	-	-	1	Mauritania	Nouakchott	15 June 1978	Weir & Pierce 2013	Dupuy & Maigret 1979	-
Phocoena phocoena	-	-	1	Mauritania	-	17 July 1975	Weir & Pierce 2013	Maigret et al. 1976	-
Phocoena phocoena	-	-	1	Mauritania	Nouakchott	23 January 1981	Weir & Pierce 2013	Maigret 1981a	-
Phocoena phocoena	-	-	1	Senegal	Fadiouth	10 February 1999	Weir & Pierce 2013	Van Waerebeek et al. 2003	-
Phocoena phocoena	-	-	1	Senegal	Dakar	1 June 1958	Weir & Pierce 2013	Cadenat 1959	-
Phocoena phocoena	-	-	1	Senegal	Dakar	4 February 1959	Weir & Pierce 2013	Cadenat 1959	-
Phocoena phocoena	8	-	*<19	Mauritania	Nouakchott and Baie du Lévrier	(unspec. time period)	Robineau & Vely 1998	Fraser 1958; Duguy 1976; Maigret et al. 1976; Dupuy & Maigret 1979; Maigret 1980a,b, 1981b; Smeenk et al. 1992	*captures + strandings = 19 (captures probably all in Weir & Pierce 2013)
Phocoena phocoena	-	-	6	Senegal	-	1978, 1979 and 1993?	Van Waerebeek et al. 2000	-	-
Phocoena phocoena	-	-	3	Mauritania	-	1993?	Van Waerebeek et al. 2000	-	-
Phocoena phocoena (unconf. ID)	1	-	-	Sierra Leone	08°30′N	(unspec. time period)	Bamy et al. 2010	Cadenat 1957	-
Phocoena phocoena (unconf. location)	-	-	1	Senegal	-	(unspec. time period)	Van Waerebeek et al. 2000	-	-
Phocoena phocoena (unconf. state of occurrence)	-	-	7	Morocco to Western Sahara	-	1980 to 2009 (unspec. time period)	Masski & De Stéphanis 2015	-	-
Physeter macrocephalus	1	-	-	Liberia	Offshore	Jan 2003 to Dec 2016 (unspec. time period)	Báez et al. 2020	-	-
Physeter macrocephalus	-	-	2	Mauritania	-	1990 to 2008 (unspec. time period)	Pinela et al. 2010	-	-
Physeter macrocephalus	-	-	6	Morocco	-	(unspec. time period)	Robineau & Vely 1998	Bayed & Beaubrun 1987	-
Physeter macrocephalus	22	-	-	Mauritania	-	15 November 2012 to 14 January 2013	Baines & Reichelt 2014	-	-
Physeter macrocephalus	1	1	-	Morocco	-	April 2005	Boisseau et al. 2010	-	-
Physeter macrocephalus	1	1	-	Morocco	-	16 January 2000	Camphuysen 2000	-	-
Physeter macrocephalus	3	max=10	-	Mauritania	-	24 January 2000	Camphuysen 2000	-	-
Physeter macrocephalus	9	1-7	-	Mauritania	-	November/December 2012	Camphuysen et al. 2012	-	-
Physeter macrocephalus	-	-	1	Senegal	Kayar	3 June 2013	Djiba et al. 2015	-	-
Physeter macrocephalus	6	-	-	Guinea-Bissau	-	October (1761-1920)	Leeney et al. 2016	Townsend 1935	-
Physeter macrocephalus	-	-	1	Mauritania	-	1992 to 1995	Robineau & Vely 1998	-	-
Physeter macrocephalus	1	3	-	Mauritania	Cap Timiris	1962	Robineau & Vely 1998	Maigret 1980a	-
Physeter macrocephalus	-	-	1	Mauritania	20km north Nouakchott	December 1980	Robineau & Vely 1998	Maigret 1981b	-
Physeter macrocephalus	-	-	1	Senegal	Saloum Delta	1997	Van Waerebeek et al. 2000	-	-
Physeter macrocephalus	-	-	1	Senegal	Joal/Fadiouth	12 November 1955	Van Waerebeek et al. 2000; Weir & Pierce 2013	Cadenat 1956a	-
Physeter macrocephalus	-	-	1	Senegal	M'Bodiene	8 January 1954	Van Waerebeek et al. 2000; Weir & Pierce 2013	Cadenat 1954, 1956a	-
Physeter macrocephalus	9	-	-	Mauritania	off Nouakchott	2 September to 1 December 2012	Russel et al. 2018	-	-
Physeter macrocephalus	-	-	1	Morocco	Mediterranean Moroccan coast	1991	Rojo-Nieto et al. 2011	-	-
Physeter macrocephalus	-	-	2	Morocco	Mediterranean Moroccan coast	2001	Rojo-Nieto et al. 2011	-	-
Physeter macrocephalus	42	1-7	-	Western Sahara	Offshore	Surveys: May to Oct 2015, Feb + Aug-Dec 2016, Jun-Sep 2017	Correia et al. 2019	-	see sheet "CETUS Data - details"
Physeter macrocephalus	15	1-6	-	Mauritania	Offshore	Surveys: May to Oct 2015, Feb + Aug-Dec 2016, Jun-Sep 2017	Correia et al. 2019	-	see sheet "CETUS Data - details"
Physeter macrocephalus	-	-	1	Senegal	Yoff	1978	Van Waerebeek et al. 2000	-	-
Physeter macrocephalus (unconf. location)	-	-	1	Senegal	-	(unspec. time period)	Van Waerebeek et al. 2000	-	-
Physeter macrocephalus (unconf. state of occurrence)	2	1,1	-	Morocco or Western Sahara	-	18 January 2000	Camphuysen 2000	-	-
Pseudorca crassidens	1	-	-	Morocco	-	(unspec. time period)	Jefferson et al. 1997	Bayed & Beaubrun 1987	-
Pseudorca crassidens	1	40	-	Morocco	110 km northwest of Rabat	3rd May 1995	Notarbartolo di Sciara et al. 1997	-	-
Pseudorca crassidens	1	8 (to 10)	-	Morocco	110 km northwest of Rabat	3rd May 1995	Notarbartolo di Sciara et al. 1997	-	-
Pseudorca crassidens	1	5	-	Mauritania	Offshore	Surveys: May to Oct 2015, Feb + Aug-Dec 2016, Jun-Sep 2017	Correia et al. 2019	-	see sheet "CETUS Data - details"
Sousa teuszii	-	-	11	Mauritania	-	1990 to 2008 (unspec. time period)	Pinela et al. 2010	-	-
Sousa teuszii	1	2	-	Guinea	-	23 May 2009	Bamy et al. 2010	-	-
Sousa teuszii	1	2	-	Mauritania	-	20 March 2003	Bowman Bishaw Goham 2003	-	-
Sousa teuszii	2	1-17	-	Western Sahara	-	1892 to 1989	Weir & Collins 2015; Robineau & Vely 1998; Bamy et al. 2010; Weir & Pierce 2013; Van Waerebeek et al. 2000; Leeney et al. 2016; Van Waerebeek et al. 2017	Altenburg & Piersma 1982; Beaubrun 1990; Busnel 1970, 1973; Cadenat 1947, 1949, 1956b, 1957; Cadenat & Paraiso 1957; Duguy 1976; Dupuy & Maigret 1979; Fraser 1949, 1973; Fulling et al. 2008; Maigret 1980b, 1981a; Maigret et al. 1976; Marchessaux & Campredon 1988; Murphy et al. 1997; Notarbartolo di Sciara et al. 1998; Sequeira & Reiner 1992; Spaans 1990; Van Bree & Duguy 1965; Van Waerebeek et al…	Weir & Collins 2015 kept
Sousa teuszii	102	1-40	6	Mauritania	-	1892 to 1989	Weir & Collins 2015; Robineau & Vely 1998; Bamy et al. 2010; Weir & Pierce 2013; Van Waerebeek et al. 2000; Leeney et al. 2016; Van Waerebeek et al. 2017	Altenburg & Piersma 1982; Beaubrun 1990; Busnel 1970, 1973; Cadenat 1947, 1949, 1956b, 1957; Cadenat & Paraiso 1957; Duguy 1976; Dupuy & Maigret 1979; Fraser 1949, 1973; Fulling et al. 2008; Maigret 1980b, 1981a; Maigret et al. 1976; Marchessaux & Campredon 1988; Murphy et al. 1997; Notarbartolo di Sciara et al. 1998; Sequeira & Reiner 1992; Spaans 1990; Van Bree & Duguy 1965; Van Waerebeek et al…	Weir & Collins 2015 kept.
Sousa teuszii	37	1-40	8	Senegal	-	1892 to 1989	Weir & Collins 2015; Robineau & Vely 1998; Bamy et al. 2010; Weir & Pierce 2013; Van Waerebeek et al. 2000; Leeney et al. 2016; Van Waerebeek et al. 2017	Altenburg & Piersma 1982; Beaubrun 1990; Busnel 1970, 1973; Cadenat 1947, 1949, 1956b, 1957; Cadenat & Paraiso 1957; Duguy 1976; Dupuy & Maigret 1979; Fraser 1949, 1973; Fulling et al. 2008; Maigret 1980b, 1981a; Maigret et al. 1976; Marchessaux & Campredon 1988; Murphy et al. 1997; Notarbartolo di Sciara et al. 1998; Sequeira & Reiner 1992; Spaans 1990; Van Bree & Duguy 1965; Van Waerebeek et al…	Weir & Collins 2015 kept.
Sousa teuszii	55	1-25	-	Guinea-Bissau	-	1892 to 1989	Weir & Collins 2015; Robineau & Vely 1998; Bamy et al. 2010; Weir & Pierce 2013; Van Waerebeek et al. 2000; Leeney et al. 2016; Van Waerebeek et al. 2017	Altenburg & Piersma 1982; Beaubrun 1990; Busnel 1970, 1973; Cadenat 1947, 1949, 1956b, 1957; Cadenat & Paraiso 1957; Duguy 1976; Dupuy & Maigret 1979; Fraser 1949, 1973; Fulling et al. 2008; Maigret 1980b, 1981a; Maigret et al. 1976; Marchessaux & Campredon 1988; Murphy et al. 1997; Notarbartolo di Sciara et al. 1998; Sequeira & Reiner 1992; Spaans 1990; Van Bree & Duguy 1965; Van Waerebeek et al…	Weir & Collins 2015 kept.
Sousa teuszii	1	1-25	-	Guinea	-	1892 to 1989	Weir & Collins 2015; Robineau & Vely 1998; Bamy et al. 2010; Weir & Pierce 2013; Van Waerebeek et al. 2000; Leeney et al. 2016; Van Waerebeek et al. 2017	Altenburg & Piersma 1982; Beaubrun 1990; Busnel 1970, 1973; Cadenat 1947, 1949, 1956b, 1957; Cadenat & Paraiso 1957; Duguy 1976; Dupuy & Maigret 1979; Fraser 1949, 1973; Fulling et al. 2008; Maigret 1980b, 1981a; Maigret et al. 1976; Marchessaux & Campredon 1988; Murphy et al. 1997; Notarbartolo di Sciara et al. 1998; Sequeira & Reiner 1992; Spaans 1990; Van Bree & Duguy 1965; Van Waerebeek et al…	Weir & Collins 2015 kept
Sousa teuszii	30	1-29	-	Senegal	Saloum Delta	21 October to 7 November 2015	Weir 2016	-	*3 re-sightings
Sousa teuszii	1	25	-	Guinea	near Tristao Islands	2011-09-01	Van Waerebeek et al. 2017	Bamy et al. 2011	-
Sousa teuszii	1	40	-	Guinea	Katfoura Island, Tristao Islands	2012-06-07	Van Waerebeek et al. 2017	Bamy et al. 2015	-
Sousa teuszii	-	-	2	Guinea	Tristao Islands	2002	Van Waerebeek et al. 2017	-	-
Sousa teuszii	-	-	1	Guinea	between Katfoura and Nafaya	2012-06-06	Van Waerebeek et al. 2017	-	-
Sousa teuszii	-	-	2	Guinea	Kaatchek	2012-06-07	Van Waerebeek et al. 2017	-	-
Sousa teuszii	7	1-17	1	Western Sahara	-	1990 to 2015 (unspec. time period)	Weir & Collins 2015; Robineau & Vely 1998; Bamy et al. 2010; Weir & Pierce 2013; Van Waerebeek et al. 2000; Leeney et al. 2016; Van Waerebeek et al. 2017	Altenburg & Piersma 1982; Beaubrun 1990; Busnel 1970, 1973; Cadenat 1947, 1949, 1956b, 1957; Cadenat & Paraiso 1957; Duguy 1976; Dupuy & Maigret 1979; Fraser 1949, 1973; Fulling et al. 2008; Maigret 1980b, 1981a; Maigret et al. 1976; Marchessaux & Campredon 1988; Murphy et al. 1997; Notarbartolo di Sciara et al. 1998; Sequeira & Reiner 1992; Spaans 1990; Van Bree & Duguy 1965; Van Waerebeek et al…	Weir & Collins 2015 kept
Sousa teuszii	14	1-40	9	Mauritania	-	1892 to 2015 (unspec. time period)	Weir & Collins 2015; Robineau & Vely 1998; Bamy et al. 2010; Weir & Pierce 2013; Van Waerebeek et al. 2000; Leeney et al. 2016; Van Waerebeek et al. 2017	Altenburg & Piersma 1982; Beaubrun 1990; Busnel 1970, 1973; Cadenat 1947, 1949, 1956b, 1957; Cadenat & Paraiso 1957; Duguy 1976; Dupuy & Maigret 1979; Fraser 1949, 1973; Fulling et al. 2008; Maigret 1980b, 1981a; Maigret et al. 1976; Marchessaux & Campredon 1988; Murphy et al. 1997; Notarbartolo di Sciara et al. 1998; Sequeira & Reiner 1992; Spaans 1990; Van Bree & Duguy 1965; Van Waerebeek et al…	Weir & Collins 2015 kept.
Sousa teuszii	8	1-40	5	Mauritania	-	1990 to 2015 (unspec. time period)	Weir & Collins 2015; Robineau & Vely 1998; Bamy et al. 2010; Weir & Pierce 2013; Van Waerebeek et al. 2000; Leeney et al. 2016; Van Waerebeek et al. 2017	Altenburg & Piersma 1982; Beaubrun 1990; Busnel 1970, 1973; Cadenat 1947, 1949, 1956b, 1957; Cadenat & Paraiso 1957; Duguy 1976; Dupuy & Maigret 1979; Fraser 1949, 1973; Fulling et al. 2008; Maigret 1980b, 1981a; Maigret et al. 1976; Marchessaux & Campredon 1988; Murphy et al. 1997; Notarbartolo di Sciara et al. 1998; Sequeira & Reiner 1992; Spaans 1990; Van Bree & Duguy 1965; Van Waerebeek et al…	Weir & Collins 2015 kept.
Sousa teuszii	25	1-40	6	Senegal	-	1990 to 2015 (unspec. time period)	Weir & Collins 2015; Robineau & Vely 1998; Bamy et al. 2010; Weir & Pierce 2013; Van Waerebeek et al. 2000; Leeney et al. 2016; Van Waerebeek et al. 2017	Altenburg & Piersma 1982; Beaubrun 1990; Busnel 1970, 1973; Cadenat 1947, 1949, 1956b, 1957; Cadenat & Paraiso 1957; Duguy 1976; Dupuy & Maigret 1979; Fraser 1949, 1973; Fulling et al. 2008; Maigret 1980b, 1981a; Maigret et al. 1976; Marchessaux & Campredon 1988; Murphy et al. 1997; Notarbartolo di Sciara et al. 1998; Sequeira & Reiner 1992; Spaans 1990; Van Bree & Duguy 1965; Van Waerebeek et al…	Weir & Collins 2015 kept.
Sousa teuszii	7	1-25	3	The Gambia	-	1990 to 2015 (unspec. time period)	Weir & Collins 2015; Robineau & Vely 1998; Bamy et al. 2010; Weir & Pierce 2013; Van Waerebeek et al. 2000; Leeney et al. 2016; Van Waerebeek et al. 2017	Altenburg & Piersma 1982; Beaubrun 1990; Busnel 1970, 1973; Cadenat 1947, 1949, 1956b, 1957; Cadenat & Paraiso 1957; Duguy 1976; Dupuy & Maigret 1979; Fraser 1949, 1973; Fulling et al. 2008; Maigret 1980b, 1981a; Maigret et al. 1976; Marchessaux & Campredon 1988; Murphy et al. 1997; Notarbartolo di Sciara et al. 1998; Sequeira & Reiner 1992; Spaans 1990; Van Bree & Duguy 1965; Van Waerebeek et al…	Weir & Collins 2015 kept.
Sousa teuszii	55	1-25	2	Guinea-Bissau	-	1990 to 2015 (unspec. time period)	Weir & Collins 2015; Robineau & Vely 1998; Bamy et al. 2010; Weir & Pierce 2013; Van Waerebeek et al. 2000; Leeney et al. 2016; Van Waerebeek et al. 2017	Altenburg & Piersma 1982; Beaubrun 1990; Busnel 1970, 1973; Cadenat 1947, 1949, 1956b, 1957; Cadenat & Paraiso 1957; Duguy 1976; Dupuy & Maigret 1979; Fraser 1949, 1973; Fulling et al. 2008; Maigret 1980b, 1981a; Maigret et al. 1976; Marchessaux & Campredon 1988; Murphy et al. 1997; Notarbartolo di Sciara et al. 1998; Sequeira & Reiner 1992; Spaans 1990; Van Bree & Duguy 1965; Van Waerebeek et al…	Weir & Collins 2015 kept.
Sousa teuszii	8	1-25	1	Guinea	-	1990 to 2015 (unspec. time period)	Weir & Collins 2015; Robineau & Vely 1998; Bamy et al. 2010; Weir & Pierce 2013; Van Waerebeek et al. 2000; Leeney et al. 2016; Van Waerebeek et al. 2017	Altenburg & Piersma 1982; Beaubrun 1990; Busnel 1970, 1973; Cadenat 1947, 1949, 1956b, 1957; Cadenat & Paraiso 1957; Duguy 1976; Dupuy & Maigret 1979; Fraser 1949, 1973; Fulling et al. 2008; Maigret 1980b, 1981a; Maigret et al. 1976; Marchessaux & Campredon 1988; Murphy et al. 1997; Notarbartolo di Sciara et al. 1998; Sequeira & Reiner 1992; Spaans 1990; Van Bree & Duguy 1965; Van Waerebeek et al…	Weir & Collins 2015 kept.
Stenella attenuata	9	7-300	-	Liberia	-	(unspec. time period)	Gray & Van Waerebeek 2011	-	-
Stenella attenuata	1	22	-	Guinea	-	22 October 2011	Djiba et al. 2015	-	-
Stenella attenuata	1	1	-	Liberia	Monrovia	18 March 2009	Gray & Van Waerebeek 2011	-	-
Stenella attenuata	6	-	-	Mauritania	off Nouakchott	2 September to 1 December 2012	Russel et al. 2018	-	-
Stenella attenuata	2	6,6	-	Western Sahara	Offshore	Surveys: May to Oct 2015, Feb + Aug-Dec 2016, Jun-Sep 2017	Correia et al. 2019	-	see sheet "CETUS Data - details"
Stenella attenuata (unconf. ID)	1	4	-	Senegal	-	17 September 1995	Van Waerebeek et al. 2000	-	-
Stenella attenuata (unconf. location)	2	-	-	West Africa	-	(unspec. time period)	Weir et al. 2014	-	-
Stenella attenuata (unconf. state of occurrence)	2	10,40	-	Morocco or Western Sahara	-	18 January 2000	Camphuysen 2000	-	-
Stenella clymene	1*	-	-	Senegal	-	(unspec. time period)	Jefferson et al. 1997	Mörzer-Bruyns 1971	*several sightings of the "Senegal dolphin"
Stenella clymene	1	40	-	Mauritania	-	15 November 2012 to 14 January 2013	Baines & Reichelt 2014	-	-
Stenella clymene	2	2,38	-	Mauritania	-	11-22 March 2003	Bowman Bishaw Goham 2003	-	-
Stenella clymene	1	10	-	Morocco	-	17 January 2000	Camphuysen 2000	-	-
Stenella clymene	1	13	-	Senegal	-	22 May 2013	Djiba et al. 2015	-	-
Stenella clymene	-	-	1	Mauritania	113km north Nouakchott	27 November 1992	Jefferson et al. 1997; Djiba et al. 2015; Weir et al. 2014; Robineau & Vely 1998	-	-
Stenella clymene	-	-	1	Senegal	off Saloum delta	20 July 1957	Jefferson et al. 1997; Weir & Pierce 2013; Weir et al. 2014; Robineau & Vely 1998; Van Waerebeek et al. 2000	Cadenat & Doutré 1958	-
Stenella clymene	-	-	1	Senegal	Gokhou M'Bath beach	15 September 1977	Jefferson et al. 1997; Weir et al. 2014; Robineau & Vely 1998; Van Waerebeek et al. 2000	Robineau & Vely 1994	-
Stenella clymene	-	-	1	Senegal	Dakar	29 June 1978	Jefferson et al. 1997; Weir et al. 2014; Robineau & Vely 1998; Van Waerebeek et al. 2000	Dupuy & Maigret 1979	-
Stenella clymene	-	-	1	Senegal	Kayar	23 February 1979	Jefferson et al. 1997; Weir et al. 2014; Robineau & Vely 1998; Van Waerebeek et al. 2000	Dupuy & Maigret 1980	-
Stenella clymene	-	-	1	Senegal	Offshore	27 October 1981	Jefferson et al. 1997; Weir et al. 2014; Robineau & Vely 1998; Van Waerebeek et al. 2000	Robineau & Vely 1994	-
Stenella clymene	-	-	1	The Gambia	Bijol Islands	November 1995	Van Waerebeek et al. 2000; Weir et al. 2014	Murphy et al. 1997	-
Stenella clymene	14	20-150	-	Mauritania	-	4 July 2011 to 27 November 2013	Weir et al. 2014; Leeney et al. 2016	-	-
Stenella clymene	1	-	-	Guinea-Bissau	-	4 July 2011 to 27 November 2013	Weir et al. 2014; Leeney et al. 2016	-	-
Stenella clymene	1	-	-	Sierra Leone	-	4 July 2011 to 27 November 2013	Weir et al. 2014; Leeney et al. 2016	-	-
Stenella clymene	1	-	-	Liberia	-	4 July 2011 to 27 November 2013	Weir et al. 2014; Leeney et al. 2016	-	-
Stenella clymene	5	-	-	Mauritania	off Nouakchott	2 September to 1 December 2012	Russel et al. 2018	-	-
Stenella clymene	10	7-700	-	Western Sahara	Offshore	Surveys: May to Oct 2015, Feb + Aug-Dec 2016, Jun-Sep 2017	Correia et al. 2019	-	see sheet "CETUS Data - details"
Stenella clymene (unconf. ID and location)	8	-	-	West Africa	-	(unspec. time period)	Weir et al. 2014	-	-
Stenella clymene (unconf. ID)	-	-	3	Senegal	Kayar	1979 and 1993?	Van Waerebeek et al. 2000	-	-
Stenella clymene (unconf. location)	2	-	-	Offshore tropical Atlantic	-	19th century	Jefferson et al. 1997	-	Perrin et al. 1991
Stenella coeruleoalba	-	-	1	Mauritania	-	1990 to 2008 (unspec. time period)	Pinela et al. 2010	-	-
Stenella coeruleoalba	-	-	1	Morocco	-	(unspec. time period)	Robineau & Vely 1998	Perrin et al. 1994	-
Stenella coeruleoalba	-	-	1	Mauritania	-	(unspec. time period)	Robineau & Vely 1998	Perrin et al. 1994	-
Stenella coeruleoalba	-	-	1	Senegal	-	(unspec. time period)	Robineau & Vely 1998	Perrin et al. 1994	-
Stenella coeruleoalba	3	-	-	Mauritania	-	15 November 2012 to 14 January 2013	Baines & Reichelt 2014	-	-
Stenella coeruleoalba	1	mean=64	-	Morocco	-	April 2005	Boisseau et al. 2010	-	-
Stenella coeruleoalba	1	15	-	Mauritania	-	11-22 March 2003	Bowman Bishaw Goham 2003	-	-
Stenella coeruleoalba	1	12	-	Morocco	-	7 July 2012	Djiba et al. 2015	-	-
Stenella coeruleoalba	-	-	1	Mauritania	-	1992 to 1995	Robineau & Vely 1998	-	-
Stenella coeruleoalba	-	-	1	Senegal	-	1882	Van Waerebeek et al. 2000	-	-
Stenella coeruleoalba	-	-	1	Senegal	Cap Vert	October 1942	Van Waerebeek et al. 2000; Weir & Pierce 2013	Cadenat 1949	-
Stenella coeruleoalba	-	-	1	Senegal	M'Bour	1 July 1949	Weir & Pierce 2013	Cadenat 1949	-
Stenella coeruleoalba	-	-	88	Morocco	Mediterranean Moroccan coast	April 2003 to September 2003	Tudela et al. 2005	-	-
Stenella coeruleoalba	-	-	1	Morocco	Mediterranean Moroccan coast	1967	Rojo-Nieto et al. 2011	-	-
Stenella coeruleoalba	-	-	2	Morocco	Mediterranean Moroccan coast	1991-1999	Rojo-Nieto et al. 2011	-	-
Stenella coeruleoalba	-	-	175	Morocco	Mediterranean Moroccan coast	2000-2008	Rojo-Nieto et al. 2011	-	-
Stenella coeruleoalba	1	4	-	Morocco	Offshore	Surveys: May to Oct 2015, Feb + Aug-Dec 2016, Jun-Sep 2017	Correia et al. 2019	-	see sheet "CETUS Data - details"
Stenella coeruleoalba	20	7-120	-	Western Sahara	Offshore	Surveys: May to Oct 2015, Feb + Aug-Dec 2016, Jun-Sep 2017	Correia et al. 2019	-	see sheet "CETUS Data - details"
Stenella coeruleoalba	1	15	-	Mauritania	Offshore	Surveys: May to Oct 2015, Feb + Aug-Dec 2016, Jun-Sep 2017	Correia et al. 2019	-	see sheet "CETUS Data - details"
Stenella coeruleoalba (unconf. state of occurrence)	1	150	-	Morocco or Western Sahara	-	18 January 2000	Camphuysen 2000	-	-
Stenella frontalis	-	-	4	Mauritania	-	1990 to 2008 (unspec. time period)	Pinela et al. 2010	-	-
Stenella frontalis	5	-	-	Mauritania	-	15 November 2012 to 14 January 2013	Baines & Reichelt 2014	-	-
Stenella frontalis	-	-	1	Guinea	Conakry	3 January 1953	Bamy et al. 2010; Weir & Pierce 2013	Cadenat 1959	-
Stenella frontalis	6	2-50	-	Mauritania	-	November/December 2012	Camphuysen et al. 2012	-	-
Stenella frontalis	1	6	-	Guinea-Bissau	9º58.041'N; 16º48.849'W	15 May 2012	Djiba et al. 2015	-	-
Stenella frontalis	1	20	-	Guinea-Bissau	11º33.689'N; 17º24.433'W	29 October 2011	Djiba et al. 2015	-	-
Stenella frontalis	2	-	-	Guinea	-	21 October 2011 to 22 May 2013	Djiba et al. 2015	-	-
Stenella frontalis	1	8	-	Morocco	34°10.300'N ; 8°29.950'W	10 September 2010	Expósito & Qninba 2010	-	-
Stenella frontalis	1	10	-	Morocco	31°52.900'N ; 11°08.100'W	11 September 2010	Expósito & Qninba 2010	-	-
Stenella frontalis	-	-	1	Mauritania	-	November 2012 to May 2013	Mullié et al. 2013	-	-
Stenella frontalis	-	-	37	Mauritania	Between Nouamghar and Lemsid	November/December 1995	Weir & Pierce 2013	Nieri et al. 1999	-
Stenella frontalis	19	-	-	Mauritania	off Nouakchott	2 September to 1 December 2012	Russel et al. 2018	-	-
Stenella frontalis	1	-	-	Senegal	Off Dakar	17 September 1995	Van Waerebeek et al. 2000	-	-
Stenella frontalis	2	10,20	-	Morocco	Offshore	Surveys: May to Oct 2015, Feb + Aug-Dec 2016, Jun-Sep 2017	Correia et al. 2019	-	see sheet "CETUS Data - details"
Stenella frontalis	29	8-150	-	Western Sahara	Offshore	Surveys: May to Oct 2015, Feb + Aug-Dec 2016, Jun-Sep 2017	Correia et al. 2019	-	see sheet "CETUS Data - details"
Stenella frontalis	8	25-100	-	Mauritania	Offshore	Surveys: May to Oct 2015, Feb + Aug-Dec 2016, Jun-Sep 2017	Correia et al. 2019	-	see sheet "CETUS Data - details"
Stenella frontalis (unconf. ID and state of occurence)	1	5	-	between Morocco and Guinea	-	21 October 2011 to 22 May 2013	Djiba et al. 2015	-	-
Stenella frontalis (unconf. state of occurrence)	1	-	-	Morocco or Western Sahara	-	21 October 2011 to 22 May 2013	Djiba et al. 2015	-	-
Stenella longirostris	-	-	5	Senegal	-	(unspec. time period)	Van Waerebeek et al. 2000	Perrin et al. 1981	-
Stenella longirostris	1	40	-	Mauritania	-	11-22 March 2003	Bowman Bishaw Goham 2003	-	-
Stenella longirostris	-	-	4	Senegal	Dakar	15 September 1958	Van Waerebeek et al. 2000; Weir & Pierce 2013; Djiba et al. 2015	Cadenat & Doutré 1959, Cadenat 1959	-
Stenella longirostris	-	-	1	Senegal	Offshore	27 October 1981	Weir & Pierce 2013	Dupuy & Maigret 1980	-
Stenella longirostris	5	-	-	Mauritania	off Nouakchott	2 September to 1 December 2012	Russel et al. 2018	-	-
Stenella longirostris (unconf. location)	1	-	-	off northwest Africa	-	1700s	Jefferson et al. 1997	Pilleri & Arvy 1981	-
Stenella longirostris (unconf. state of occurrence)	5	max=9	-	Morocco or Western Sahara	-	18 January 2000	Camphuysen 2000	-	-
Stenella sp.	-	-	1	Senegal	-	(unspec. time period)	Van Waerebeek et al. 2000	-	-
Stenella sp.	1	150	-	Mauritania	-	November/December 2012	Camphuysen et al. 2012	-	-
Stenella sp.	-	-	1	Senegal	Cap Vert	26 November 1996	Van Waerebeek et al. 2000	-	-
Stenella sp.	-	-	1	Senegal	Dakar	3 August 1978	Weir & Pierce 2013	Dupuy & Maigret 1979	-
Stenella sp.	-	-	1	Senegal	Joal	14 June 1979	Weir & Pierce 2013	Dupuy & Maigret 1980	-
Stenella sp.	-	-	1	Mauritania	-	(unspec. time period)	Weir & Pierce 2013	Maigret 1994	-
Stenella sp. (unconf. state of occurrence)	1	2	-	Morocco or Western Sahara	-	18 January 2000	Camphuysen 2000	-	-
Steno bredanensis	4	-	1	Mauritania	Baie du Lévrier and Cap Timiris	(unspec. time period)	Robineau & Vely 1998	Duguy 1976; Maigret 1980a	-
Steno bredanensis	-	-	4	Senegal	-	(unspec. time period)	Van Waerebeek et al. 2000	-	-
Steno bredanensis	-	-	28	Senegal	Cap Vert	(unspec. time period)	Van Waerebeek et al. 2000	Cadenat 1949	-
Steno bredanensis	1	12	-	Mauritania	-	15 November 2012 to 14 January 2013	Baines & Reichelt 2014	-	-
Steno bredanensis	-	-	1	Senegal	Hann	21 October 1969	Van Waerebeek et al. 2000	-	-
Steno bredanensis	-	-	7	Senegal	Camberene	29 May 1948	Van Waerebeek et al. 2000	-	-
Steno bredanensis	-	-	1	Senegal	Dakar	15 September 1958	Van Waerebeek et al. 2000; Weir & Pierce 2013	Cadenat & Doutré 1959, Cadenat 1959	-
Steno bredanensis	-	-	1	Senegal	Kayar	15 March 1979	Weir & Pierce 2013	Dupuy & Maigret 1980	-
Steno bredanensis	2	-	-	Mauritania	off Nouakchott	2 September to 1 December 2012	Russel et al. 2018	-	-
Steno bredanensis	1	10	-	Morocco	Offshore	Surveys: May to Oct 2015, Feb + Aug-Dec 2016, Jun-Sep 2017	Correia et al. 2019	-	see sheet "CETUS Data - details"
Steno bredanensis	1	30	-	Western Sahara	Offshore	Surveys: May to Oct 2015, Feb + Aug-Dec 2016, Jun-Sep 2017	Correia et al. 2019	-	see sheet "CETUS Data - details"
Steno bredanensis (unconf. location)	-	-	1	Senegal	-	(unspec. time period)	Van Waerebeek et al. 2000	-	-
Tursiops truncatus	139	1-77	1	Guinea-Bissau	-	(unspec. time period)	Leeney et al. 2016	Spaans 1990; Wolff 1998	-
Tursiops truncatus	-	-	60	Mauritania	-	1990 to 2008 (unspec. time period)	Pinela et al. 2010	-	-
Tursiops truncatus	-	-	*<15	Senegal	-	(unspec. time period)	Robineau & Vely 1998	Cadenat 1959; Dupuy & Maigret 1976, 1978, 1980	*captures + strandings = 15 (captures probably all in Weir & Pierce 2013); Robineau & Vely 1998 also reports on 17 specimens on Dakar collections that were cited from Van Waerebeek et al. 2000
Tursiops truncatus	5	-	-	Mauritania	-	15 November 2012 to 14 January 2013	Baines & Reichelt 2014	-	-
Tursiops truncatus	-	-	1	Guinea	Bonfi	10 March 2002	Bamy et al. 2010; Weir & Pierce 2013	Bamy et al. 2006	-
Tursiops truncatus	-	-	1	Guinea	Boulbinet	11 December 2005	Bamy et al. 2010; Weir & Pierce 2013	-	-
Tursiops truncatus	3	2-5	-	Mauritania	-	12-17 March 2003	Bowman Bishaw Goham 2003	-	-
Tursiops truncatus	1	3	-	Mauritania	-	22 January 2000	Camphuysen 2000	-	-
Tursiops truncatus	1	3	-	Mauritania	-	23 January 2000	Camphuysen 2000	-	-
Tursiops truncatus	3	1-12	-	Mauritania	-	November/December 2012	Camphuysen et al. 2012	-	-
Tursiops truncatus	1	50	-	Guinea-Bissau	-	15 May 2012	Djiba et al. 2015	-	-
Tursiops truncatus	5	-	-	Senegal	Dakar	April to June 2013	Djiba et al. 2015	-	-
Tursiops truncatus	-	-	6	Mauritania	-	November 2012 to May 2013	Mullié et al. 2013	-	-
Tursiops truncatus	67	10-40	94	Mauritania	-	1992 to 1995	Robineau & Vely 1998	-	-
Tursiops truncatus	-	-	4	Mauritania	Cap Blanc	1980 to 1981	Robineau & Vely 1998	Maigret 1981a	-
Tursiops truncatus	-	-	1	Mauritania	Baie du Repos	23 December 1980	Robineau & Vely 1998; Weir & Pierce 2013	Maigret 1980a	-
Tursiops truncatus	2	4,10	-	Mauritania	-	18 and 19 April 2004	Tulp & Leopold 2004	-	-
Tursiops truncatus	2	min=4	-	Senegal	Casamance River	17 September 1995	Van Waerebeek et al. 2000	-	-
Tursiops truncatus	-	-	13	Senegal	-	1976 to 1993	Van Waerebeek et al. 2000	-	-
Tursiops truncatus	-	-	19	Senegal	-	1950, 1956 and 1958	Van Waerebeek et al. 2000	-	-
Tursiops truncatus	-	-	1	Senegal	Cap Vert	6 November 1997	Van Waerebeek et al. 2000	-	-
Tursiops truncatus	-	-	1	Senegal	Djifer	11 November 1996	Van Waerebeek et al. 2000	-	-
Tursiops truncatus	-	-	1	Senegal	Joal	22 May 1996	Van Waerebeek et al. 2000	-	-
Tursiops truncatus	-	-	1	Senegal	Djifer	28 June 1996	Van Waerebeek et al. 2000	-	-
Tursiops truncatus	-	-	1	Senegal	Palmarin	16 November 1997	Van Waerebeek et al. 2000	-	-
Tursiops truncatus	-	-	2	Senegal	Palmarin	16 October 1997	Van Waerebeek et al. 2000	-	-
Tursiops truncatus	-	-	1	Senegal	Palmarin	15 October 1997	Van Waerebeek et al. 2000	-	-
Tursiops truncatus	-	-	1	Senegal	Sangomar	22 November 1996	Van Waerebeek et al. 2000	-	-
Tursiops truncatus	-	-	1	The Gambia	Sanyang	12 January 1998	Van Waerebeek et al. 2000	-	-
Tursiops truncatus	-	-	1	The Gambia	Bijol Islands	August 1996	Van Waerebeek et al. 2000	-	-
Tursiops truncatus	-	-	1	The Gambia	Fajara	October 1996	Van Waerebeek et al. 2000	-	-
Tursiops truncatus	-	-	2	The Gambia	Solifor and Sanyang	January 1997	Van Waerebeek et al. 2000	-	-
Tursiops truncatus	-	-	1	The Gambia	Kiang West	June 1996	Van Waerebeek et al. 2000	-	-
Tursiops truncatus	-	-	1	The Gambia	3nm off Gunjur	17 January 1997	Van Waerebeek et al. 2000	-	-
Tursiops truncatus	-	-	1	The Gambia	3nm off Gunjur	13 January 1997	Van Waerebeek et al. 2000	-	-
Tursiops truncatus	-	-	3	The Gambia	Albreda	18 June 1998	Van Waerebeek et al. 2000	-	-
Tursiops truncatus	32	4-23+	-	The Gambia	Gambia river	4 March to 16 June 1998	Van Waerebeek et al. 2000	-	-
Tursiops truncatus	30	2-40+	-	The Gambia	Gambia estuary	5 March to 4 April 1998	Van Waerebeek et al. 2000	-	-
Tursiops truncatus	1	8-9	-	The Gambia	Bijol Islands	3 November 1997	Van Waerebeek et al. 2000	-	-
Tursiops truncatus	1	4	-	The Gambia	Gambia river	9 June 1998	Van Waerebeek et al. 2000	-	-
Tursiops truncatus	1	10	-	The Gambia	Gambia estuary	June 1998	Van Waerebeek et al. 2000	-	-
Tursiops truncatus	1	1	-	Guinea-Bissau	-	13 July 1996	Van Waerebeek et al. 2000, Leeney et al. 2016	-	-
Tursiops truncatus	4	2-10	-	Guinea-Bissau	-	11-21 January 1998	Van Waerebeek et al. 2000, Leeney et al. 2016	-	-
Tursiops truncatus	1	-	-	Guinea-Bissau	Cabo Roxo	10 January 1998	Van Waerebeek et al. 2000, Leeney et al. 2016	-	-
Tursiops truncatus	-	-	4	The Gambia	3-4nm Gunjur	13, 13, 17 January; 18 February 1951	Van Waerebeek et al. 2000; Weir & Pierce 2013	Murphy et al. 1997	-
Tursiops truncatus	-	-	3	Senegal	Hann	February 1944	Weir & Pierce 2013	Cadenat 1947	-
Tursiops truncatus	-	-	1	The Gambia	Gunjur	26 September 2000	Weir & Pierce 2013	Van Waerebeek et al. 2003	-
Tursiops truncatus	-	-	1	Senegal	Hann	March 1942	Weir & Pierce 2013	Cadenat 1947	-
Tursiops truncatus	-	-	1	Senegal	Joal	20 December 1944	Weir & Pierce 2013	Cadenat 1947, 1949	-
Tursiops truncatus	-	-	1	Senegal	Joal	15 December 1955	Weir & Pierce 2013	Cadenat 1957	-
Tursiops truncatus	-	-	1	Senegal	M'Bour	15 January 1957	Weir & Pierce 2013	Cadenat 1957	-
Tursiops truncatus	-	-	1	Senegal	Fass Boye	24 June 1977	Weir & Pierce 2013	Dupuy & Maigret 1978	-
Tursiops truncatus	-	-	1	Senegal	Palmarin	27 January 1979	Weir & Pierce 2013	Dupuy & Maigret 1980	-
Tursiops truncatus	-	-	1	Mauritania	Between Nouamghar and Lemsid	November/December 1995	Weir & Pierce 2013	Nieri et al. 1999	-
Tursiops truncatus	-	-	1	Senegal	Hann	1977	Weir & Pierce 2013	Dupuy & Maigret 1978	-
Tursiops truncatus	11	-	-	Mauritania	off Nouakchott	2 September to 1 December 2012	Russel et al. 2018	-	-
Tursiops truncatus	-	-	1	Guinea	Tristao Islands	2011	Van Waerebeek et al. 2017	Bamy et al. 2011	-
Tursiops truncatus	-	-	2	Morocco	Mediterranean Moroccan coast	1991-1999	Rojo-Nieto et al. 2011	-	-
Tursiops truncatus	-	-	7	Morocco	Mediterranean Moroccan coast	2000-2008	Rojo-Nieto et al. 2011	-	-
Tursiops truncatus	10	4-130	-	Western Sahara	Offshore	Surveys: May to Oct 2015, Feb + Aug-Dec 2016, Jun-Sep 2017	Correia et al. 2019	-	see sheet "CETUS Data - details"
Tursiops truncatus	10	4-50	-	Mauritania	Offshore	Surveys: May to Oct 2015, Feb + Aug-Dec 2016, Jun-Sep 2017	Correia et al. 2019	-	see sheet "CETUS Data - details"
Tursiops truncatus	2	5,25	-	Senegal	Offshore	Surveys: May to Oct 2015, Feb + Aug-Dec 2016, Jun-Sep 2017	Correia et al. 2019	-	see sheet "CETUS Data - details"
Tursiops truncatus (unconf. ID and state of occurrence)	5	-	-	between Morocco and Guinea	-	21 October 2011 to 22 May 2013	Djiba et al. 2015	-	-
Tursiops truncatus (unconf. ID)	1	1	-	Senegal	Yoff	18 July 1998	Van Waerebeek et al. 2000	-	-
Tursiops truncatus (unconf. ID)	1	1	-	Senegal	Joal	3 August 1998	Van Waerebeek et al. 2000	-	-
Tursiops truncatus (unconf. ID)	-	-	1	The Gambia	Albreda	18 June 1998	Van Waerebeek et al. 2000	-	-
Tursiops truncatus (unconf. location)	-	-	2	Senegal	-	(unspec. time period)	Van Waerebeek et al. 2000	-	-
Tursiops truncatus (unconf. state of occurrence)	20	-	-	between Morocco and Guinea	-	21 October 2011 to 22 May 2013	Djiba et al. 2015	-	-
Tursiops truncatus or Sousa teuszii (unconf. ID)	-	-	1	The Gambia	North bank	25 October 1996	Van Waerebeek et al. 2000; Weir & Pierce 2013	Murphy et al. 1997	-
Ziphius cavirostris	-	-	1	Morocco	32º60N	1980 to 2009 (unspec. time period)	Masski & De Stéphanis 2015	-	-
Ziphius cavirostris	-	-	1	Morocco	15km north Casablanca	(unspec. time period)	Robineau & Vely 1998; Van Waerebeek et al. 2000	Aloncle 1967	-
Ziphius cavirostris	2	2,2	-	Mauritania	-	23 January 2000	Camphuysen 2000	-	-
Ziphius cavirostris	1	2	-	Morocco	33°58.400'N ; 8°50.839'W	10 September 2010	Expósito & Qninba 2010	-	-
Ziphius cavirostris	-	-	1	Mauritania	-	1992 to 1995	Robineau & Vely 1998	-	-
Ziphius cavirostris	-	-	2	Morocco	Mediterranean Moroccan coast	2007, 2005	Rojo-Nieto et al. 2011	-	-
Ziphius cavirostris	2	1,1	-	Morocco	Offshore	Surveys: May to Oct 2015, Feb + Aug-Dec 2016, Jun-Sep 2017	Correia et al. 2019	-	see sheet "CETUS Data - details"
Ziphius cavirostris	2	1,1	-	Western Sahara	Offshore	Surveys: May to Oct 2015, Feb + Aug-Dec 2016, Jun-Sep 2017	Correia et al. 2019	-	see sheet "CETUS Data - details"
Ziphius cavirostris (unconf. location)	-	-	1	Senegal	-	(unspec. time period)	Robineau & Vely 1998; Van Waerebeek et al. 2000	-	-

## Sheet: Records - qualitative
Records of Cetaceans in literature for the northwestern Africa (Morocco - Liberia) - Qualitative data
Species	Range states	Source
Balaenoptera acutorostrata	Western Sahara to Mauritania, The Gambia	Van Waerebeek et al. 2000
Balaenoptera acutorostrata	Senegal, Guinea	Robards & Reeves 2011
Balaenoptera acutorostrata (unconf. state of occurrence)	Morocco or Western Sahara	Masski & De Stéphanis 2015
Balaenoptera borealis	Morocco	Robineau & Vely 1998
Balaenoptera borealis	Senegal	Van Waerebeek et al. 2000
Balaenoptera borealis	Morocco	Masski & De Stéphanis 2015
Balaenoptera edeni	Morocco	Masski & De Stéphanis 2015
Balaenoptera edeni	Senegal, Guinea	Robards & Reeves 2011
Balaenoptera edeni (unconf. location)	Mauritania to Senegal	Robineau & Vely 1998
Balaenoptera musculus	Morroco, Senegal	Robineau & Vely 1998
Balaenoptera musculus	Morocco	Masski & De Stéphanis 2015
Balaenoptera musculus (unconf. state of occurrence)	Morocco or Western Sahara	Masski & De Stéphanis 2015
Balaenoptera physalus	Morocco, Senegal	Robineau & Vely 1998
Balaenoptera physalus	Morocco	Masski & De Stéphanis 2015
Balaenoptera physalus (unconf. state of occurrence)	Morocco or Western Sahara	Masski & De Stéphanis 2015
Delphinus delphis	Morocco to Western Sahara, Senegal to Guinea	Perrin & Van Waerebeek, 2012
Delphinus delphis	Senegal	Robards & Reeves 2011
Delphinus delphis	Marocco, Senegal	Robineau & Vely 1998
Delphinus delphis	Morocco	Masski & De Stéphanis 2015
Delphinus delphis	Morocco to Senegal, Guinea to Liberia	Jefferson et al. 1997
Delphinus delphis	Sierra Leone	Moore et al. 2010
Delphinus delphis (unconf. ID and location)	Guinea	Bamy et al. 2010
Eubalaena glacialis	Western Sahara	Robineau & Vely 1998
Eubalaena glacialis	Morocco	Masski & De Stéphanis 2015
Feresa attenuata	Senegal	Jefferson et al. 1997
Feresa attenuata	Senegal	Perrin & Van Waerebeek, 2012
Feresa attenuata	Senegal	Robineau & Vely 1998
Feresa attenuata	Senegal	Robards & Reeves 2011
Globicephala macrorhynchus	Mauritania to Senegal	Jefferson et al. 1997
Globicephala macrorhynchus	Mauritania to Guinea	Perrin & Van Waerebeek, 2012
Globicephala macrorhynchus	Senegal	Robineau & Vely 1998
Globicephala macrorhynchus	Mauritania, Guinea-Bissau	Van Waerebeek et al. 2000
Globicephala macrorhynchus	Morocco	Masski & De Stéphanis 2015
Globicephala macrorhynchus	Senegal	Robards & Reeves 2011
Globicephala macrorhynchus (unconf. state of occurrence)	Morocco or Western Sahara	Masski & De Stéphanis 2015
Globicephala melas	Morocco, Mauritania to Senegal	Jefferson et al. 1997
Globicephala melas	Morocco, Mauritania, The Gambia	Perrin & Van Waerebeek, 2012
Globicephala melas	Morocco	Robineau & Vely 1998
Globicephala melas	Morocco	Masski & De Stéphanis 2015
Globicephala melas (unconf. state of occurrence)	Morocco or Western Sahara	Masski & De Stéphanis 2015
Globicephala sp.	Sierra Leone	Moore et al. 2010
Grampus griseus	Morocco, Mauritania to Senegal	Jefferson et al. 1997
Grampus griseus	Morocco, Mauritania to Senegal, Guinea-Bissau	Perrin & Van Waerebeek, 2012
Grampus griseus	Morocco	Robineau & Vely 1998
Grampus griseus	Mauritania	Van Waerebeek et al. 2000
Grampus griseus	Morocco	Masski & De Stéphanis 2015
Grampus griseus	Senegal	Robards & Reeves 2011
Grampus griseus (unconf. state of occurrence)	Morocco or Western Sahara	Masski & De Stéphanis 2015
Hyperoodon ampullatus	Morocco	Perrin & Van Waerebeek, 2012
Hyperoodon ampullatus	Morocco	Masski & De Stéphanis 2015
Hyperoodon ampullatus (unconf. location)	Morocco	Robineau & Vely 1998
Kogia breviceps	Mauritania to Senegal, Guinea	Perrin & Van Waerebeek, 2012
Kogia breviceps	Senegal	Robineau & Vely 1998
Kogia breviceps	Morocco	Masski & De Stéphanis 2015
Kogia breviceps	Guinea	Robards & Reeves 2011
Kogia breviceps (unconf. state of occurrence)	Morocco or Western Sahara	Masski & De Stéphanis 2015
Kogia sima	Senegal	Perrin & Van Waerebeek, 2012
Kogia sima	Senegal	Robineau & Vely 1998
Kogia sp.	Sierra Leone	Moore et al. 2010
Lagenodelphis hosei	Senegal	Perrin & Van Waerebeek, 2012
Lagenodelphis hosei	Morocco	Masski & De Stéphanis 2015
Megaptera novaeangliae	Senegal	Robineau & Vely 1998
Megaptera novaeangliae	Morocco	Masski & De Stéphanis 2015
Mesoplodon densirostris	Mauritania to Senegal	Perrin & Van Waerebeek, 2012
Mesoplodon densirostris (unconf. state of occurrence)	Morocco or Western Sahara	Masski & De Stéphanis 2015
Mesoplodon europaeus	Mauritania, Guinea-Bissau	Perrin & Van Waerebeek, 2012
Mesoplodon europaeus (unconf. state of occurrence)	Morocco or Western Sahara	Masski & De Stéphanis 2015
NI dolphin	Morocco	Masski & De Stéphanis 2015
NI dolphin	Mauritania, Guinea-Bissau, Sierra Leone	Robards & Reeves 2011
NI dolphin	Sierra Leone	Weir&Pierce 2013
Orcinus orca	Morocco to Senegal, Guinea, Liberia	Jefferson et al. 1997
Orcinus orca	Morocco to The Gambia, Liberia	Perrin & Van Waerebeek, 2012
Orcinus orca	Western Sahara, Senegal	Robineau & Vely 1998
Orcinus orca	Morocco	Masski & De Stéphanis 2015
Peponocephala electra	Mauritania to Senegal, Guinea-Bissau	Perrin & Van Waerebeek, 2012
Peponocephala electra	Mauritania to Senegal	Robineau & Vely 1998
Peponocephala electra	Mauritania	Van Waerebeek et al. 2000
Phocoena phocoena	Morocco, Mauritania to Senegal	Jefferson et al. 1997
Phocoena phocoena	Morocco to Senegal	Perrin & Van Waerebeek, 2012
Phocoena phocoena	Morocco, Senegal	Robineau & Vely 1998
Phocoena phocoena	Senegal	Robards & Reeves 2011
Phocoena phocoena (unconf. ID)	Guinea	Jefferson et al. 1997
Physeter macrocephalus	Senegal	Robineau & Vely 1998
Physeter macrocephalus	Morocco	Masski & De Stéphanis 2015
Physeter macrocephalus (unconf. state of occurence)	Morocco or Western Sahara	Masski & De Stéphanis 2015
Pseudorca crassidens	Morocco, Senegal	Perrin & Van Waerebeek, 2012
Pseudorca crassidens	Morocco	Robineau & Vely 1998
Pseudorca crassidens	Morocco	Masski & De Stéphanis 2015
Pseudorca crassidens (unconf. state of occurence)	Morocco or Western Sahara	Masski & De Stéphanis 2015
Sousa teuszii	Morocco to Senegal, Guinea to Guinea-Bissau	Jefferson et al. 1997
Sousa teuszii	Western Sahara to Guinea	Perrin & Van Waerebeek, 2012
Sousa teuszii	Morocco	Masski & De Stéphanis 2015
Sousa teuszii	Sierra Leone	Moore et al. 2010
Sousa teuszii	Mauritania to The Gambia, Guinea	Robards & Reeves 2011
Stenella attenuata	Senegal, Guinea	Perrin & Van Waerebeek, 2012
Stenella attenuata	Senegal	Robineau & Vely 1998
Stenella attenuata	Senegal	Robards & Reeves 2011
Stenella attenuata (unconf. location)	West Africa	Jefferson et al. 1997
Stenella clymene	Mauritania to The Gambia	Perrin & Van Waerebeek, 2012
Stenella coeruleoalba	Morocco	Jefferson et al. 1997
Stenella coeruleoalba	Mauritania to Senegal	Perrin & Van Waerebeek, 2012
Stenella coeruleoalba	Morocco	Masski & De Stéphanis 2015
Stenella coeruleoalba (unconf. state of occurrence)	Morocco or Western Sahara	Masski & De Stéphanis 2015
Stenella frontalis	Senegal, Guinea	Jefferson et al. 1997
Stenella frontalis	Mauritania to Senegal, Guinea	Perrin & Van Waerebeek, 2012
Stenella frontalis	Senegal	Robineau & Vely 1998
Stenella frontalis (unconf. state of occurrence)	Morocco or Western Sahara	Masski & De Stéphanis 2015
Stenella longirostris	Western Sahara, Senegal	Robineau & Vely 1998
Stenella longirostris	Mauritania to Senegal, Liberia	Jefferson et al. 1997
Stenella longirostris	Senegal , Guinea, Liberia	Perrin & Van Waerebeek, 2012
Stenella longirostris (unconf. state of occurrence)	Morocco or Western Sahara	Masski & De Stéphanis 2015
Stenella sp. (unconf. ID)	Sierra Leone	Moore et al. 2010
Steno bredanensis	Morocco, Mauritania to Senegal	Jefferson et al. 1997
Steno bredanensis	Mauritania to Senegal, Guinea	Perrin & Van Waerebeek, 2012
Steno bredanensis	Senegal	Robineau & Vely 1998
Steno bredanensis	Mauritania	Van Waerebeek et al. 2000
Steno bredanensis	Sierra Leone	Moore et al. 2010
Steno bredanensis	Senegal	Robards & Reeves 2011
Steno bredanensis (unconf. location)	Guinea	Bamy et al. 2010
Steno bredanensis (unconf. state of occurrence)	Morocco or Western Sahara	Masski & De Stéphanis 2015
Tursiops truncatus	Morocco, Mauritania to Senegal, Guinea-Bissau	Jefferson et al. 1997
Tursiops truncatus	Morocco, Mauritania to Guinea	Perrin & Van Waerebeek, 2012
Tursiops truncatus	Mauritania to Senegal	Robineau & Vely 1998
Tursiops truncatus	Morocco	Expósito & Qninba 2010
Tursiops truncatus	Morocco	Masski & De Stéphanis 2015
Tursiops truncatus	Sierra Leone	Moore et al. 2010
Tursiops truncatus	Senegal to The Gambia, Guinea	Robards & Reeves 2011
Tursiops truncatus (unconf. state of occurrence)	Morocco or Western Sahara	Masski & De Stéphanis 2015
Ziphius cavirostris	Morocco, Mauritania to Senegal	Perrin & Van Waerebeek, 2012
Ziphius cavirostris	Mauritania	Van Waerebeek et al. 2000
Ziphius cavirostris (unconf. state of occurrence)	Morocco or Western Sahara	Masski & De Stéphanis 2015

## Sheet: References
Aloncle H (1967) Deuxième note sur les petits cétacés de la baie ibéro-marocaine. Bulletin de l'Institut des Pêches Maritimes du Maroc 12: 21-42.
Altenburg W, Piersma T (1982) Faunistical varia, in: Altenburg, W., Engelmoer, M., Mes, R., Piersma, T. (Eds.), Wintering waders on the Banc d’Arguin, Mauritania. Report of the Netherlands Ornithological Mauritanian Expedition 1980. Stichting Veth tot Steun aan Waddenonderzoek, Leiden, pp. 212–216.
Báez JC, de Stephanis R, García-Ramos MC, Ramos ML, Pascual P (2020) Differential space distribution of the genus Balaenoptera in the eastern tropical Atlantic Ocean. Regional Studies in Marine Science 37: 101346
Baines ME, Reichelt M (2014) Upwellings, canyons and whales: An important winter habitat for balaenopterid whales off Mauritania, northwest Africa. Journal of Cetacean Research and Management 14: 57-67.
Bamy IL, Van Waerebeek K, Bah SS, Dia M, Kaba B, Keita N, Konate S, Tall H (2006) The cetaceans of Guinea, a first check-list of documented species. Paper SC/58/O15 presented to the Scientific Committee of the International Whaling Commission, St. Kitts and Nevis, 2006.
Bamy IL, Van Waerebeek K, Bah SS, Dia M, Kaba B, Keita N, Konate S (2010) Species occurrence of cetaceans in Guinea, including humpback whales with southern hemisphere seasonality. Marine Biodiversity Records 3: e48.
Bamy IL (2011) Inventaire des cétacés dans la zone des Iles Tristao. Projet de Gestion Côtière et Marine de la Biodiversité. Ministère de la Pêche et de l’Aquaculture, Conakry, Guinée (unpublished).
Bamy IL, Oulare A, Soumah NL (2015) Menaces sur des petits cétacés rencontrés sur les côtes guinéennes. Bulletin Centre Halieutiques Boussoura 5 (1-2):24-31.
Bayed A, Beaubrun PC (1987) Les mammifères marins du Maroc : inventaire préliminaire. Mammalia 51(3) : 437-446.
Beaubrun PC (1990) Un cetacé nouveau pour les côtes sudmarocaines: Sousa teuszii(Kükenthal, 1892). Mammalia 54: 162-164.
Benchoucha S, Tamsouri MN, El Aamri F (2018) First stranding record of Kogia sima (Owen, 1866) in Morocco (Strait of Gibraltar). Journal of Black Sea 24(2): 175-179.
Boisseau O, Lacey C, Lewis T, Moscrop A, Danbolt M, McLanaghan R (2010) Encounter rates of cetaceans in the Mediterranean Sea and contiguous Atlantic area. Journal of the Marine Biological Association of the United Kingdom 90(8): 1589-1599.
Boisseau O, Matthews J, Gillespie D, Lacey C, Moscrop A, El Ouamari N (2007) A visual and acoustic survey for harbour porpoises off North-West Africa: further evidence of a discrete population. African Journal of Marine Science 29(3): 403-410.
Bowman Bishaw Gorham. Chinguetti Development Project (2003) Seabird and Cetacean Surveys in the Vicinity of the Chinguetti Oil Field, Offshore Mauritania. Woodside Australian Energy, 66pp.
Brown SG (1959) Whales observed in the Atlantic Ocean. Notes on their distribution. Norsk Hvalfangst-Tidende 48: 289-308.
Busnel (1970) - not found
Busnel RG (1973) Symbiotic relationship between man and dolphins. Transactions of the New York Academy of Sciences 35: 113-131.
Cadenat J (1947) Observations de cétacés au Sénégal. Notes Africaines 34: 20-23.
Cadenat J (1949) Notes sur les cétacés observés sur les côtes du Sénégal de 1941 à 1948. Bulletin de l'Institut Français d'Afrique Noire 11: 1-15.
Cadenat J (1954) Echouage d’un cachalot sur les côtes du Sénégal. Notes Africaines 64: 119-121.
Cadenat J (1955) A propos d’un échouage de baleine à Dakar. Notes Africaines 67: 91-94.
Cadenat J (1956a) A propos de cachalot. Notes Africaines 71: 82-91.
Cadenat J (1956b) Un delphinidae encore mal connu de la côte occidentale d’Afrique: Sotalia teüszii Kukenthal 1892. Bulletin de l'Institut Français d'Afrique Noire 18A: 555-566.
Cadenat J (1957) Observations de cétacés, siréniens, chéloniens et sauriens en 1955-1956. Bulletin de l'Institut Français d'Afrique Noire 19A: 1358-1375.
Cadenat J (1958) Notes sur les Delphinidés ouest-africains II. Un spécimen du genre Feresa capturé sur les côtes du Sénegal. Bull. De l'IFAN 20 A (4): 1486-1491.
Cadenat J (1959) Rapport sur les petits cétacés ouest-africaines. Résultats des recherches enterprises sur ces animaux jusqu’au mois de mars 1959. Bulletin de l'Institut Français d'Afrique Noire 21A: 1367-1440.
Cadenat J, Doutré M (1958) Notes sur les Delphinidés ouest-africains. I. Un Prodelphinus? indéterminé des côtes du Sénégal. Bulletin de l'Institut Français d'Afrique Noire 20: 1483-1485.
Cadenat J, Doutré M (1959) Notes sur les Delphinidés ouest-africains. V. Sur un Prodelphinus à long bec capturé au large des côtes du Sénégal Prodelphinus longirostris (Gray 1828)? Bulletin de l'Institut Français d'Afrique Noire 21: 787-798.
Cadenat J, Paraiso F (1957). Nouvelle observation de Sotalia (Cétacé, Delphinide) sur les côtes du Sénégal. Bulletin de l’Institut Français d’Afrique Noire 19A: 324-332.
Camphuysen CJ (2000) Seabirds and marine mammals off West Africa – Responses 2000 cruise report. Netherlands Institute for Sea Research, 50pp.
Camphuysen CJ, van Spanje TM, Verdaat H (2012) Ship based seabird and marine mammal surveys off Mauritania, Nov-Dez 2012 – cruise report. Mauritanian Institute for oceanographic research and fisheries - IMROP, 73pp.
Castells A, Mayo M (1992) Relacion de citas de cetaceos (Mammalia, Cetacea) España y Portugal. Centro de Estudios de Mammiferos Marinos, Madrid. 96 pp.
Correia AM, Gandra M, Liberal M, Valente R, Gil A, Rosso M, Pierce GJ, Sousa-Pinto I (2019) A dataset of cetacean occurrences in the Eastern North Atlantic – effort-based data in oceanic waters. Scientific Data 6:177.
Djiba A, Bamy IL, Bilal ASO, Van Waerebeek K (2015) Biodiversity of cetaceans in coastal waters of northwest Africa: new insights through platform-of-opportunity visual surveying in 2011-2013. IOC Technical Series 115: 283-297.
Duguy R, van Bree PH (1977). Catalogue de la collection des mammifères marins du Muséum de Bordeaux. Annales de la Société des Sciences Naturelles de la Charente Maritime VI(4): 289-307.
Duguy R (1976) Contribution a l’etude des mammiferes marins de la cote nord-ouest Afrique. Revue des Travaux de l’Institut des Pêches Maritimes 39: 321-332.
Dupuy AR (1974) Un orque épaulard dans la Baie de Hann (Sénégal). Notes Africaines 142: 40-42.
Dupuy AR, Maigret J (1976) Les mammifères marins des côtes du Sénégal. 1. Bilan des observations signalées entre 1960 et 1976. Bulletin de l'Institut Fondamental d'Afrique Noire 38: 921-928.
Dupuy AR, Maigret J (1978) Les mammifères marins des côtes du Sénégal. 2. Observations signalées en 1977. Bulletin de l'Institut Fondamental d'Afrique Noire 40A: 457-465.
Dupuy AR, Maigret J (1979) Les mammifères marins des côtes du Sénégal. 3. Observations signalées en 1978. Bulletin de l'Institut Fondamental d'Afrique Noire 41A: 429-439.
Dupuy AR, Maigret J (1980) Les mammifères marins des côtes du Sénégal. 4. Observations signalées en 1979. Bulletin de l'Institut Fondamental d'Afrique Noire 42A: 401-409.
Expósito CG, Qninba A (2010). Observations de Tortues, d’Oiseaux et de Mammifères marins au large des côtes atlantiques marocaines durant l’automne 2010. Bulletin de l’Institut Scientifique, Rabat, section Sciences de la Vie 32 (2): 129-132
Fraser FC (1949) A specimen of Sotalia tëuszii Kukenthal from the coast of Senegal. Journal of Mammalogy 30: 274-76.
Fraser FC (1958) Common or harbour porpoises from French West Africa. Bulletin de l'Institut Français d'Afrique Noire 20: 276-285.
Fraser FC (1973) Record of dolphin (Sousa teuszii) from the coast of Mauritania. Transactions of the New York Academy of Sciences 35: 132-135.
Fulling GL, Foster J, Fertl DC, Fagin T (1998). Pilot survey of coastal small cetaceans in the waters of Guinea-Bissau. Unpublished report to Truk Bissau, November 2008.
Gray H, Van Waerebeek KV (2011). Postural instability and akinesia in a pantropical spotted dolphin,Stenella attenuata, in proximity to operating airguns of a geophysical seismic vessel. Journal for Nature Conservation 19: 363-367.
Hammond PS, Lockyer C (1988) Distribution of killer whales in the eastern North Atlantic. Rit Fiskideildar 11: 24-41.
Hazevoet CJ, Gravanita B, López Suárez P, Wenzel FW (2011) Seasonality of humpback whale Megaptera novaeangliae (Borowski,1781) records in Cape Verde seas: evidence for the occurrence of stocks from both hemispheres? Zoologia Caboverdiana 2, 25-29.
Jallow AO, Cham AM, Barnett LK, Van Waerebeek K (2005) Conservation of cetaceans in The Gambia: Whale and Dolphin Field Research. In: Proceedings from the First Biodiversity Research Symposium The Gambia, May 2005. Barnett, L. (ed.). Makasutu Wildlife Trust, Darwin Initiative Project, pp. 37‐54.
Jefferson TA, Curry BE, Leatherwood S, Powell JA (1997) Dolphins and porpoises of West Africa: a review of records (Cetacea: Delphinidae, Phocoenidae). Mammalia 61: 87-108.
Jung J, Mullié WC, Van Waerebeek K, Wagne MM, Bilal ASO, Sidaty ZEO, et al. (2016) Omura's whale off West Africa: autochthonous population or inter-oceanic vagrant in the Atlantic Ocean? Marine Biology Research 12: 66-75.
Kirpichnikov, A. A. 1950. Nablyadeniya nad raspredeleniyem kruphykh Kitoobraznakh v Atlanti cheskom okeane. [Observations on the distribution of large cetaceans in the Atlantic Ocean]. Priroda Leningrad 10, pp. 63‐64. Cited in Tomilin, 1967 (original in Russian).
Leeney RH, Weir CR, Campredon P, Regalla A, Foster J (2016) Occurrence of Atlantic humpback (Sousa teuszii) and bottlenose (Tursiops truncatus) dolphins in the coastal waters of Guinea-Bissau, with an updated cetacean species checklist. Journal of the Marine Biological Association of the United Kingdom 96(4): 933-941.
Lydersen C, Vacquié‑Garcia J, Heide‑Jørgensen MP, Øien N , Guinet C, Kovacs KM (2020) Autumn movements of fin whales (Balaenoptera physalus) from Svalbard, Norway, revealed by satellite tracking. Scientific Reports 10:16966.
Maigret J (1980a) Les mammiferes marins des cotes de Mauritanie. Etat des observations en 1980. Bulletin du Centre National de Recherches Oceanographiques et des Peches de Nouadhibou 9: 130-152.
Maigret J (1980b) Données nouvelles sur l’écologie du Sousa teuszii (Cetacea, Delphinidae) de la côte ouest africaine. Bulletin de l'Institut Fondamental d'Afrique Noire 42A: 619-633.
Maigret J (1981a) Les mammiferes marins des cotes de Mauritanie. 2. Rapport annuel des observations signalees en 1981. Bulletin du Centre National de Recherches Oceanographiques et des Peches de Nouadhibou 10: 81-85.
Maigret J (1981b) Rapports entre les cétacés et la pêche thonière dans l’Atlantique tropical oriental. Notes Africaines 171: 77-84.
Maigret J (1990) Observations d'Orques Orcinus orca Linné, 1758 sur les côtes nord ouest africanes. Bulletin de l'Institut Fondamental d'Afrique Noire 47A: 190-197.
Maigret J (1994) Marine mammals and fisheries along the West African coast. Reports of the International Whaling Commission 15: 307-316.
Maigret J, Robineau D (1981) Le genre Kogia (Cetacea, Physeteridae) sur les côtes du Sénégal. Mammalia 45 (2): 199-204.
Maigret J, Trotignon J, Duguy R (1976) Observations de cetaces sur les cotes de Mauritanie (1971-1975). Conseil International pour l’Exploration de la Mer, Comite des Mammiferes Marins, C.M. 1976/N, 4: 1-6.
Maigret J (1977) Les mammifères du Sénégal. II. Les mammifères marins. Bulletin AASNS, Vol. 57, pp. 13‐30.
Marchessaux D, Campredon P (1988). Ecologie des delphinides dans le Parc National du Banc d’Arguin, Republique Islamique de Mauritanie. Rapport Preliminaire, Avril 1988.
Martín V (1997). Opportunistic feeding behaviour by minke whales (Balaenoptera acutorostrata) in association with sardine purse-seine fishery operations in Garnet's Bay, north-western Sahara. European Research Cetaceans [Abstracts] 10:252.
Masski H, de Stéfanis R (2015) Cetaceans of the Moroccan coast: information from areconstructed strandings database. Journal of the Marine Biological Association of the United Kingdom 1-9.
Moore JE, Cox TM, Lewison RL, Read AJ, Bjorkland R, McDonald SL, et al.(2010) An interview-based approach to assess marine mammal ans sea turtle captures in artisanal fisheries. Biological Conservation 143: 795–805.
Mörzer-Bruyns WFG (1971) Fieldguide of whales and dolphins. C.A. Mes, Amsterdam, 258 pp.
Mullié WC, Wagne MM, Elmamy CAA, Yahya FM, Van Waerebeek K (2013) Large number of stranded harbour porpoises Phocoena phocoena as by-catch victims in Mauritania. Scientific Committee Document of International Whaling Commission, Jeju, Korea, June 2013. SC/65a/HIM03, 5pp.
Murphy PF, Van Waerebeek K, Jallow A (1997) Cetaceans in Gambian coastal waters. Paper SC/49/SM11 presented to the Scientific Committee of the International Whaling Commission, Bournemouth, UK.
Nieri M, Grau E, Lamarche B, Aguilar A (1999) Mass mortality of Atlantic spotted dolphins (Stenella frontalis) caused by a ﬁshing interaction in Mauritania. Marine Mammal Science 15: 847–854.
Notarbartolo di Sciara G, Barbaccia G, Azzellino A (1997) Birth at sea of a false killer whale, Pseudorca crassidens. Marine Mammal Science 13(3):508-511.
Notarbartolo di Sciara G, Politi E, Bayed A, Beaubrun PC, Knowlton A (1998). A winter cetacean survey off southern Morocco, with a special emphasis on right whales. Reports of the International Whaling Commission 48: 547-550.
Perrin WF, Mitchell ED, Mead JG, Caldwell DK and van Bree, PJH (1981) Stenella clymene, a rediscovered tropical dolphin of the Atlantic. Journal of Mammalogy 62(3): 583-598
Perrin WF, Wilson CE, Archer Fl (1994) Striped dolphin Stenella coeruleoalba (Meyen, 1833), pp. 129-160 in S.H. Ridgway & R. Harrison (eds.): Handbook of marine mammals, Volume 5, Academie Press.
Pilleri G, Arvy L (1981) Antoine Joseph Pernetty (1716-1801), on board l/Aigle 1763-1764, and spinner porpoise (Stenella longirostris). Invest. Cetacea, 12: 48-50.
Pinela AM, Borrel A, Cardona L, Aguilar A (2010) Stable isotope analysis reveals habitat partitioning among marine mammals off the NW African coast and unique trophic niches for two globally threatened species. Marine Ecology Progress Series 416: 295-306.
Reeves RR, Mitchell E (1988) Killer whale sightings and takes by American pelagic whalers in the North Atlantic. Rit Fiskideildar 11: 7–23.
Reiner (1980). First record of a Antillean beaked whale, Mesoplodon europaeus Gervais 1855, from República popular da Guiné-Bissau. Memórias do Museu do Mar Ser.Zool.1 (8): 1-8.
Robineau D, Vely M (1993) Stranding of a specimen of Gervais' Beaked whale (Mesoplodon europaeus) on the coast of west Africa (Mauritania). Marine Mammal Science 9(4): 438-440.
Robineau D, Vely M (1998) Ces cétacés des côtes de Mauritanie (Afrique du Nordouest). Particularltés et variations spatio-temporelles de repartition: role des facteurs oceanographiques. Revue d Ecologie (Terre Vie) 53.
Robineau D, Vély M., Maigret J. (1994) Stenella clymene (Cetacea, Delphinidae) from the coast of West Africa. Journal of Mammalogy 75: 766-767.
Robards MD, Reeves RR (2011) The global extentand character of marine mammal consumption by humans (1970-2009). Biological conservation 144: 2770-2786.
Rojo–Nieto E, Álvarez–Díaz PD, Morote E, Burgos–Martín M, Montoto–Martínez T, Sáez–Jiménez J, Toledano F (2011) Strandings of cetaceans and sea turtles in the Alboran Sea and Strait of Gibraltar: a long–term glimpse at the north coast (Spain) and the south coast (Morocco). Animal Biodiversity and Conservation 34(1): 151-163.
Russell G, Sánchez-Cabanes A, Nimak-Wood M (2018) The autumn occurrence and spatial distribution of cetaceans in the waters of Mauritania during a geophysical survey in 2012. African Journal of Marine Science 40(4): 371-381.
Sequeira M, Reiner F (1992) First record of an Atlantic humpback dolphin, Sousa teuszii Kükenthal, 1892 (Cetacea; Delphinidae) in Guinea-Bissau. Mammalia 56: 311-313.
Smeenk C, Leopold MF, Adding MJ (1992) Note on the harbour porpoise Phocoena phocoena in Mauritania, West Africa. Lutra, 35: 98-104.
Spaans B (1990) Dolphins in the coastal area of Guiné Bissau. Lutra 33: 126-131.
Tsai CH, Mead JG (2018) Crossing the equator: a northern occurrence of the pygmy right whale. Zoological Letters 4:30.
Tomilin AG (1967) Mammals of the USSR and adjacent countries. Volume X. Cetacea. Original title: Zveri SSSR i prilezhashchikh stran, Izdatel'stvo Akademi Nauk SSSR, Moskva 1957. Israel Program for Scientific Translations, Jerusalem.
Tormosov et al. 1980 - not found
Townsend CH (1935) The distribution of certain whales as shown by logbook records of American whaleships. Zoologica 19: 1-50.
Trotignon J (1979). Parc National du Banc d'Arguin. Comptes Rendys d'Activities scientifiques, Oct. 1977-Feb. 1979.
Tudela S, Kai Kai A, Maynou F, El Andalossi M, Guglielmi P (2005) Driftnet fishing and biodiversity conservation: the case study of the large-scale Moroccan driftnet fleet operating in the Alboran Sea (SW Mediterranean). Biological Conservation 121: 65-78.
Tulp I, Leopold MF (2004) Marine mammals and seabirds in Mauritanian waters. Pilot study April 2004 - Internal Report. RIVO-Netherlands Institute for Fisheries Research - Animal Sciences Group. Wageningen UR, 42 pp.
van Bree PJH, Cadenat J (1968) On a skull of Peponocephala electra (Gray, 1846) (Cetacea, Delphinidae) from Senegal. Beaufortia 14: 193-202.
van Bree PJH, Duguy R (1965). Sur un crâne de Sotalia teuszii Kükenthal, 1892 (Cetacea, Delphinidae). Zeitschrift fur Saügetierkunde 30: 311-314.
Van Waerebeek K, André M, Sequeira M, Martín V, Robineau D, Collet A, Papastavrou V, Ndiaye E (1999) Spatial and temporal distribution of the minke whale, Balaenoptera acutorostrata (Lacépède, 1804), in the southern northeast Atlantic Ocean and the Mediterranean Sea, with reference to stock identity. Journal of Cetacean Research and Management 1: 223-237.
Van Waerebeek K, Barnett L, Camara A, Cham A, Diallo M, Djiba A et al. (2003) Conservation of Cetaceans in The Gambia and Senegal, 1999-2001, and Status of the Atlantic Humpback Dolphin. WAFCET-2 report. UNEP/CMS Secretariat, Bonn, Germany.
Van Waerebeek K, Barnett L, Camara A, Cham A, Diallo M, Djiba A et al. (2004) Distribution, status, and biology of the Atlantic humpback dolphin, Sousa teuszii (Kükenthal, 1892). Aquatic Mammals 30: 56-83.
Van Waerebeek K, Diallo M, Djiba A, Ndiaye P, Ndiaye E (1997) Cetacean Research in Senegal 1995-97, an Overview. Paper SC/49/SM10 presented to the Scientific Committee of the International Whaling Commission, Bournemouth, 1997.
Van Waerebeek K, Ndiaye E, Djiba A, Diallo M, Murphy P, Jallow A, Camara A, Ndiaye P, Tous P (2000) A survey of the conservation status of cetaceans in Senegal, The Gambia and Guinea-Bissau. UNEP/CMS Secretariat, Bonn, Germany.
Van Waerebeek K, Djiba A, Krakstad JO, Samba Ould Bilal A, Almeida A, Mass Mbye E (2013) New evidence for a South Atlantic stock of humpback whales wintering on the Northwest African continental shelf. African Zoology, 48 (1): 177‐186.
Van Waerebeek K, Uwagbae M, Segniagbeto G, Bamy IL, Ayissi I (2017) New records of Atlantic humpback dolphin (Sousa teuszii) in Guinea, Nigeria, Cameroon and Togo underscore pressure from fisheries and marine bushmeat demand. Revue d’Ecologie (Terre et Vie) 72(2):192-205.
Weir CR (2016). Atlantic humpback dolphins Sousa teuszii in the Saloum Delta (Senegal): distribution, relative abundance and photo-identification. African Journal of Marine Science 38(3): 385–394
Weir CR (2015) Photo-identification and habitat use of Atlantic humpback dolphins (Sousa teuszii) around the Río Nuñes estuary in Guinea (West Africa). African Journal of Marine Science, doi: 10.2989/1814232X.2015.1069757.
Weir C, Collins T (2015) A review of the geographical distribution and habitat of the Atlantic humpback dolphin (Sousa teuszii). Advances in Marine Biology 72: 79-117. doi:10.1016/bs.amb.2015.08.001
Weir CR, Coles P, Ferguson A, May D, Baines M, Figueirdo I et al. (2014) Clymene dolphins (Stenella clymene) in the eastern tropical Atlantic: distribution, group size, and pigmentation pattern. Journal of Mammalogy 95(6): 1289-1298.
Weir CR, Pierce GJ (2013) A review of the human activities impacting cetaceans in the eastern tropical Atlantic. Mammal Review 43: 258-274.
Wolff WJ (Ed.) (1998) The end of the east-Atlantic flyway. Waders in Guinea-Bissau. Report on a cooperative research project in the estuaries of Guinea-Bissau, October 1992-May 1993. WIWO Report No. 39. Foundation Working Group for International Waterbird and Wetland Research, Zeist, Utrecht, Netherlands. 94 pp.
Zeeberg J, Corten A, de Graaf E (2006) Bycatch and release of pelagic megafauna in industrial trawler fisheries off Northwest Africa. Fisheries Research 78: 186-195.
